# Supplementary material for: Sobre la interpretación chomskyana de Port Royal
Source: PLOS journal article supplement (doi:10.1371/journal.pone.0109195), 1982-01-01
Supplement: S1 (10.1371/journal.pone.0109195.s001) [file journal.pone.0109195.s001.pdf › journal.pone.0109195.s001.pdf]

# Supporting Information

## The Scientific Impact of Nations: Journal Placement and Citation Performance

Matthew J. Smith<sup>1</sup>, Cody Weinberger<sup>1</sup>, Emilio M. Bruna<sup>2,3</sup> & Stefano Allesina<sup>1,4</sup>

<sup>1</sup>Department of Ecology & Evolution, University of Chicago, Chicago, IL, USA

<sup>2</sup>Center for Latin American Studies, University of Florida, Gainesville, FL, USA

<sup>3</sup>Department of Wildlife Ecology and Conservation, University of Florida, Gainesville, FL, USA

<sup>4</sup>Computation Institute, University of Chicago, Chicago, IL, USA

\*Corresponding author: Matthew Smith (mjsmith037@gmail.com)

# Contents

|          |                                                                     |           |
|----------|---------------------------------------------------------------------|-----------|
| <b>1</b> | <b>Data Collection</b>                                              | <b>3</b>  |
| <b>2</b> | <b>Methods/Results</b>                                              | <b>4</b>  |
| 2.1      | Number of countries and specific countries of affiliation . . . . . | 4         |
| 2.2      | Proportions of papers and citations . . . . .                       | 6         |
| 2.3      | Regressions Against National Metrics . . . . .                      | 7         |
| <b>3</b> | <b>Figures</b>                                                      | <b>8</b>  |
| <b>4</b> | <b>Tables</b>                                                       | <b>24</b> |
| <b>5</b> | <b>Appendix A: Scopus Search Parameters</b>                         | <b>28</b> |

# 1 Data Collection

2 For each field of interest, we extracted a list of contributing journals and their 2011 Impact Factors  
3 (IF) from Web of Science (Thomson Reuters). All journals for which an IF did not exist in 2011,  
4 which did not publish any “articles” (as defined by Scopus) in 2011, or which could not be matched  
5 to a journal within Scopus via ISSN were ignored. For each remaining journal, we downloaded  
6 from SciVerse Scopus (Elsevier) summary data of each paper published between 1996 and 2012  
7 classified as an “article” within the Scopus database. For each paper published, we obtained a list  
8 of the Authors, the year of publication, the journal of publication, the number of citations received  
9 as of the date of download, a list of the affiliations associated with each author, and a list of the  
10 references cited in the publication. All data were downloaded between the dates of May 4th and  
11 May 28th, 2013. Due to limitations imposed by Scopus on the downloading of publication data,  
12 the number of publications retrieved from each journal for a given year were restricted to 2000.  
13 This restriction was rarely applied and likely had a minimal effect upon the conclusions drawn in  
14 this paper. Detailed instructions for data collection are available in Appendix A.

15 The affiliations for each publication were parsed and the identifiable countries were extracted,  
16 such that each publication was associated with a list of the unique countries found in the author  
17 affiliations. Thus, a publication resulting from a collaboration of two researchers in the United  
18 Kingdom and one in Germany would produce the country identifier [United Kingdom, Germany].  
19 Country names were standardized according to those recognized in the CIA World Factbook and  
20 their respective iso-3 codes for representation in figures [1, 2] (Table S4). Publications for which no  
21 country names were able to be parsed were removed from the analysis; as were articles published  
22 in 2013, due to a greater potential for age to confound our analysis. Age will likely have a larger  
23 effect on the more recent papers because the error in our age estimation is a greater percentage  
24 of the paper’s total age for these papers. This is a product of only having the year of publication  
25 (i.e. there could be as much as 11 months difference in age between two papers published in the  
26 same year and as little as one month between papers of consecutive years). Future studies looking  
27 at the influence of paper age at a higher resolution could better determine the magnitude of such  
28 an effect. Removing these papers also helps to reduce the potential effect of a delay before a paper  
29 is discovered and begins receiving citations. The data were further refined through the removal  
30 of publications for which no references or year of publication were listed. The number of papers  
31 collected for each field and the number remaining after refinement are summarized in Table S1.

32 Economic and demographic data for specific countries were obtained from the Organisation for  
33 Economic Co-operation and Development (OECD) [3]. These include: the percentage of govern-  
34 ment researchers as a percentage of the national total, the tertiary-level educational attainment

35 for age group 25-64 as a percentage of population (of that age group), the per capita gross domes-  
36 tic product (GDP), 2009 Programme for International Student Assessment scores in mathematics  
37 (proficiency levels), gross domestic expenditures on research and development as a percentage of  
38 GDP, and women researchers as a percentage of total researchers.

## 39 **2 Methods/Results**

40 Our analysis considers two complementary metrics of publication success: journal placement and  
41 citation performance. Journal placement (JP) is a measure of the quality of journal in which a given  
42 paper is published (as indicated by IF, either directly or, more powerfully, through categorization  
43 into tiers based upon quantile within all journals of a given field). Citation performance (CP) is  
44 an indication of a paper's post-publication performance given the journal and year of publication.  
45 This can be measured directly by comparing the total number of citations a paper has accrued  
46 to those of other publications of the same journal volume or by categorizing the performance by  
47 quantile within all publications of that journal-year combination. The quantiles used in both cases  
48 for this analysis were the top 10%, 10-25%, 25-50%, 50-75%, and 75-100%. This asymmetrical  
49 division was chosen to more accurately detect differences in performance given the highly skewed  
50 distributions of journal Impact Factors and paper citation rates.

### 51 **2.1 Number of countries and specific countries of affiliation**

52 That papers with multiple countries in their affiliations do better than papers with fewer is obvious  
53 from the cumulative distribution functions in Figures 1 and S1, yet these plots do not take other  
54 factors into consideration which are known to have an effect on citation rates, e.g. the number  
55 of authors [4]. To parse these effects and determine the independent influence of the number  
56 of countries found in a paper's affiliations, we fit the data to two separate statistical models: a  
57 multiple linear regression model and a proportional odds model, using the statistical software R  
58 and the R-package `Ordinal`, respectively [5, 6]. For each, both journal placement and citation  
59 performance were modeled. Variables taken into account in these models include the journal of  
60 publication, the age of the paper, the base-ten logarithm of the number of references cited in the  
61 paper, the number of authors, and the number of countries represented in those authors' affiliations.  
62 A two-fold approach allows the comparison of results, strengthening any conclusions drawn from  
63 these analyses. The proportional odds model was chosen in addition to the more common multiple  
64 regression to allow for greater statistical power, at the cost of more detailed information regarding  
65 specific effects of the various factors involved.

66 Though multiple linear regressions are ubiquitous in statistical analyses, the proportional odds

67 model is less well known, and thus will be briefly explained here. The proportional odds model is  
68 an ordered logit statistical model in which the data are divided into ordered response groups or  
69 tiers which are either inherent to the data or assigned prior to analysis (in our case these were the  
70 quantiles of impact factor and number of citations). These serve as the dependent variable we are  
71 seeking to explain. The distribution of the data among these groups is then assessed with respect  
72 to explanatory factors or covariates (in our case, we are most interested in the affiliated-country  
73 list) [7]. Differences in the distribution of data points (papers) for each value of the covariate (e.g.  
74 ‘Canada + United Kingdom’) lead to correspondingly separate coefficients (slopes) for each, with  
75 one value of the independent variable taken as a reference to determine an intercept for each tier (we  
76 used the United States). Thus, the intercept can be thought of as a baseline from which individual  
77 country affiliations deviate according to their coefficient. An important assumption of this model is  
78 that the relative effect (or ‘odds ratio’) of a given covariate is constant across tiers [7]. Put another  
79 way, the relative (dis)advantage given to a paper through the possession of a given country list  
80 compared to a paper from a different country is the same regardless of which particular journal or  
81 citation tier we choose for the comparison. A more complete explanation of the proportional odds  
82 model and the underlying statistics can be found in McCullagh [7] and Agresti[8].

83 Thus, the linear models took the form:

$$84 \log(\text{Journal IF}) \sim$$

$$85 \text{Number of Authors} * \text{Number of Countries} + \log(\text{Number of References}) + \text{Specific Country Affiliation}$$

$$86 \log(\text{Number of Citations} + 1) \sim$$

$$87 \text{Num. Authors} * \text{Num. Countries} + \log(\text{Num. References}) + \text{Journal} + \text{Age} + \text{Spec. Country Aff.}$$

88 And the proportional odds models:

$$89 \text{Journal Quantile} \sim \text{Num. Authors} * \text{Num. Countries} + \log(\text{Num. References}) + \text{Spec. Country Aff.}$$

$$90 \text{Citation Quantile} \sim \text{Num. Authors} * \text{Num. Countries} + \log(\text{Num. References}) + \text{Spec. Country Aff.}$$

91 Where the term to the left of the ‘ $\sim$ ’ is modeled with respect to the variables on the right. A  
92 ‘+’ indicates a combination of elementary terms; ‘\*’ indicates both main effects and interactions  
93 between variables. The interaction between the number of authors and the number of countries  
94 was explicitly considered due to the link between these variables, namely: Number of Authors  $\geq$   
95 Number of Countries in most cases. The discrepancy between the two model types in the citation  
96 performance analysis is a result of the binning of citation counts into quantiles (as we have defined  
97 them), which take the journal and year into account prior to application of the proportional odds  
98 analysis.

99 The coefficients for the fifty most common specific country affiliations were ordered from least  
100 to greatest and plotted for each field considered (Figure S2). The United States was taken as a

101 reference point for each plot. Country ordering did not vary qualitatively between statistical tests  
102 (proportional odds model vs. multiple linear regression). Most countries' relative position was also  
103 conserved between response variables (JP or CP), however there are several cases in which drastic  
104 shifts are evident: Brazil in Mathematics, USA + France in Psychology, etc. See Figure S3 for a  
105 graphical representation of this shift and the discussion in the main text for potential causes of this  
106 discrepancy.

107 The analysis was repeated without the specific country affiliation and again with a subset of  
108 the total data in which only papers with over five authors were considered (in this latter case, the  
109 number of authors was removed from the independent variables as well). The former allowed the  
110 evaluation of whether the addition of specific-country affiliations enhanced the model (it did, both  
111 in terms of the coefficient of determination and AIC, Table S3), while the latter provided some  
112 confirmation that the effect of multiple countries is not merely a consequence of the necessarily  
113 greater number of authors (Table S3).

## 114 **2.2 Proportions of papers and citations**

115 Following the lead of previous publications [9, 10, 11], we investigated the relationship between the  
116 proportion of total papers published in a year  $p_P$  and the proportion of total citations accrued in  
117 the same year  $p_C$ , for several countries in eight separate fields. Instead of simply comparing these  
118 two numbers, however, we sought to enhance this analysis through dividing the interpretation of  
119 any discrepancy into Journal Placement (JP) and Citation Performance (CP). This interpretation  
120 is beneficial as it allows a more precise identification of the source of a discrepancy between  $p_P$   
121 and  $p_C$ . For example, a country that consistently publishes in high-ranking journals (high JP),  
122 but receives the expected number of citations for papers in those journals (average CP) would  
123 have the same effect as a country that publishes in average journals (average JP) but outperforms  
124 other papers in those journals in terms of citations (high CP):  $p_P < p_C$ , despite very different  
125 sources of this inequality. To separate these two potential causes of discrepancy between  $p_P$  and  
126  $p_C$ , we estimated the expected number of citations accrued by given country when accounting for  
127 its level of JP. This was accomplished through repeatedly randomizing the number of citations  
128 received by a country through sampling from equivalent papers. That is, for each paper published  
129 by a given country, we replaced the actual number of citations with one drawn from a list of all  
130 papers published in the same journal and year and which also had a similar number of authors  
131 (similar being defined by binning the authors into groups of 1, 2, 3, 4, 5, 6-10, 11-15, 16-20, or >20  
132 authors). The total number of citations was then recalculated with the sampled citation counts.  
133 This process was repeated 10,000 times and a 95% confidence interval of the resulting distribution

134 was drawn. An analogous figure to the commonly represented line-graph comparison of  $p_P$  and  $p_C$   
135 was then produced (Figure S4), with the  $p_C$  line now contextualized by an expected proportion  
136 of citations based on the given country's JP. It can be seen that in the majority of cases the  
137 JP completely explains the discrepancy between  $p_C$  and  $p_P$  (i.e.  $p_C$  consistently falls within the  
138 confidence interval of the expected proportion of citations). Put yet another way: we see a  $p_C$  that  
139 is not significantly different from what we would expect once we have taken the journal placement  
140 into account. Despite this majority, some cases still reveal discrepancies between the observed and  
141 expected  $p_C$ . In these cases, we can say with confidence that the number of citations is also being  
142 acted upon by CP (either positively or negatively, depending on the direction of the deviation).

### 143 **2.3 Regressions Against National Metrics**

144 Once demonstrated, the claim that certain countries and country combinations perform better than  
145 others raises the question of what is the source of inequality. Two possible interpretations include  
146 differences in key national statistics and bias. As bias is discussed within the main text, here  
147 we will elaborate upon the former hypothesis. To test the existence and effect of properties that  
148 affect publication performance, we regressed several metrics extracted from the OECD against the  
149 country-specific coefficients produced by the two statistical analyses using simple linear models of  
150 the form Coefficients  $\sim$  Metric. GDP was the most consistently significant predictor of success,  
151 showing a positive relationship in all fields except Psychology for JP in both the linear model (LM)  
152 and the proportional odds model (POM). For CP, GDP showed a positive relationship in all fields  
153 for the POM, and in six of the eight fields (all but Ecology and Mathematics) for the LM. Out of the  
154 six metrics we tested, only the percentage of women researchers was never significantly regressed  
155 with the coefficients of either test. The results for the remaining five metrics are shown in Table S2.

156 These metrics can explain why some countries perform better than others, but are less effective  
157 at explaining why a country may have a large discrepancy between JP and CP: though there are  
158 differences in explanatory power between JP and CP for certain metrics, the sign of the effect is  
159 conserved in all cases. To explain these differences, we turn to the second hypothesis mentioned  
160 above and discussed within the main text.

### 161 **3 Figures**

162 All figures were drawn using the R-package `ggplot2` with the help of several accessory packages  
163 [12, 13, 14, 15]. Tables were generated using either the R-package `xtable` [16] or the web application  
164 at `truben.no/latex/table/`.



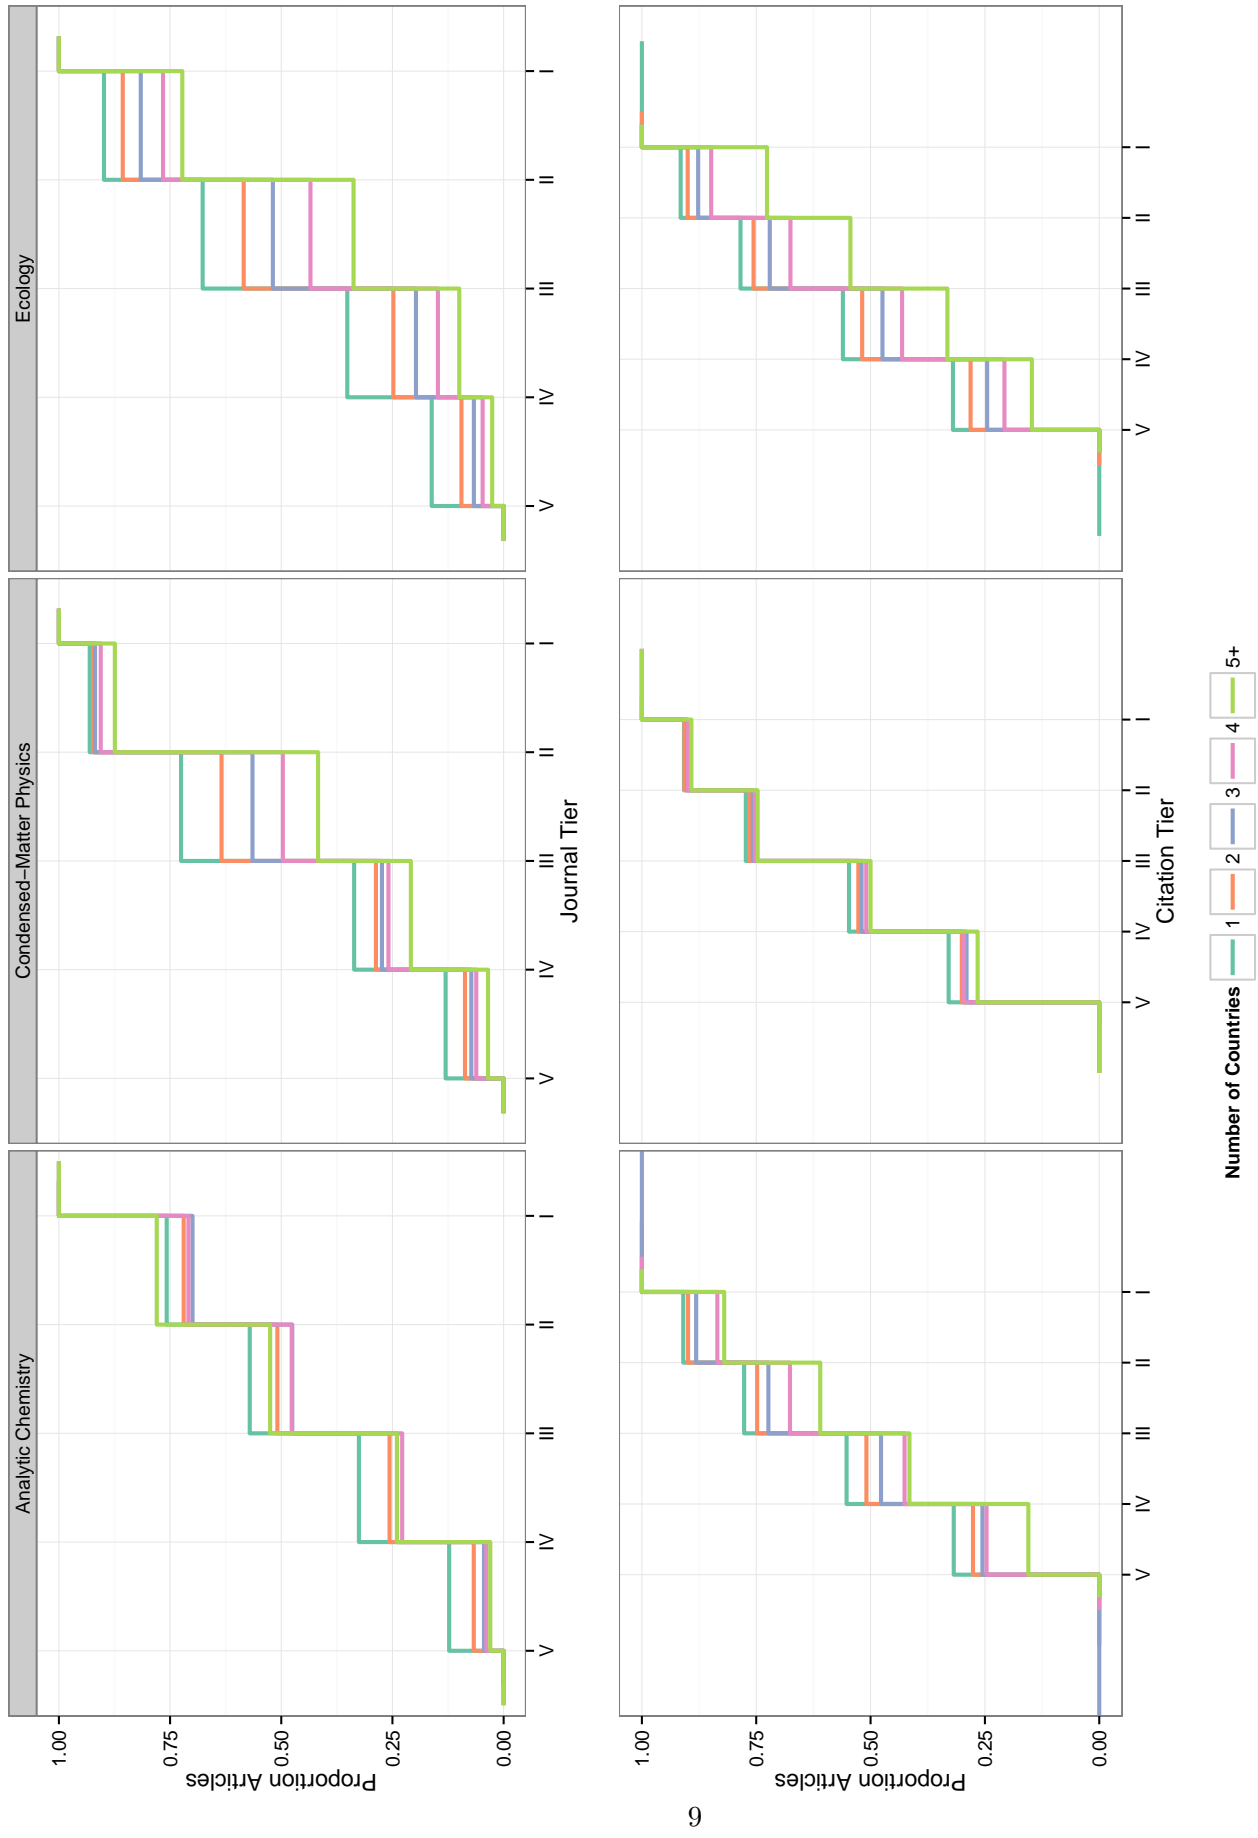

(a)

Figure S1

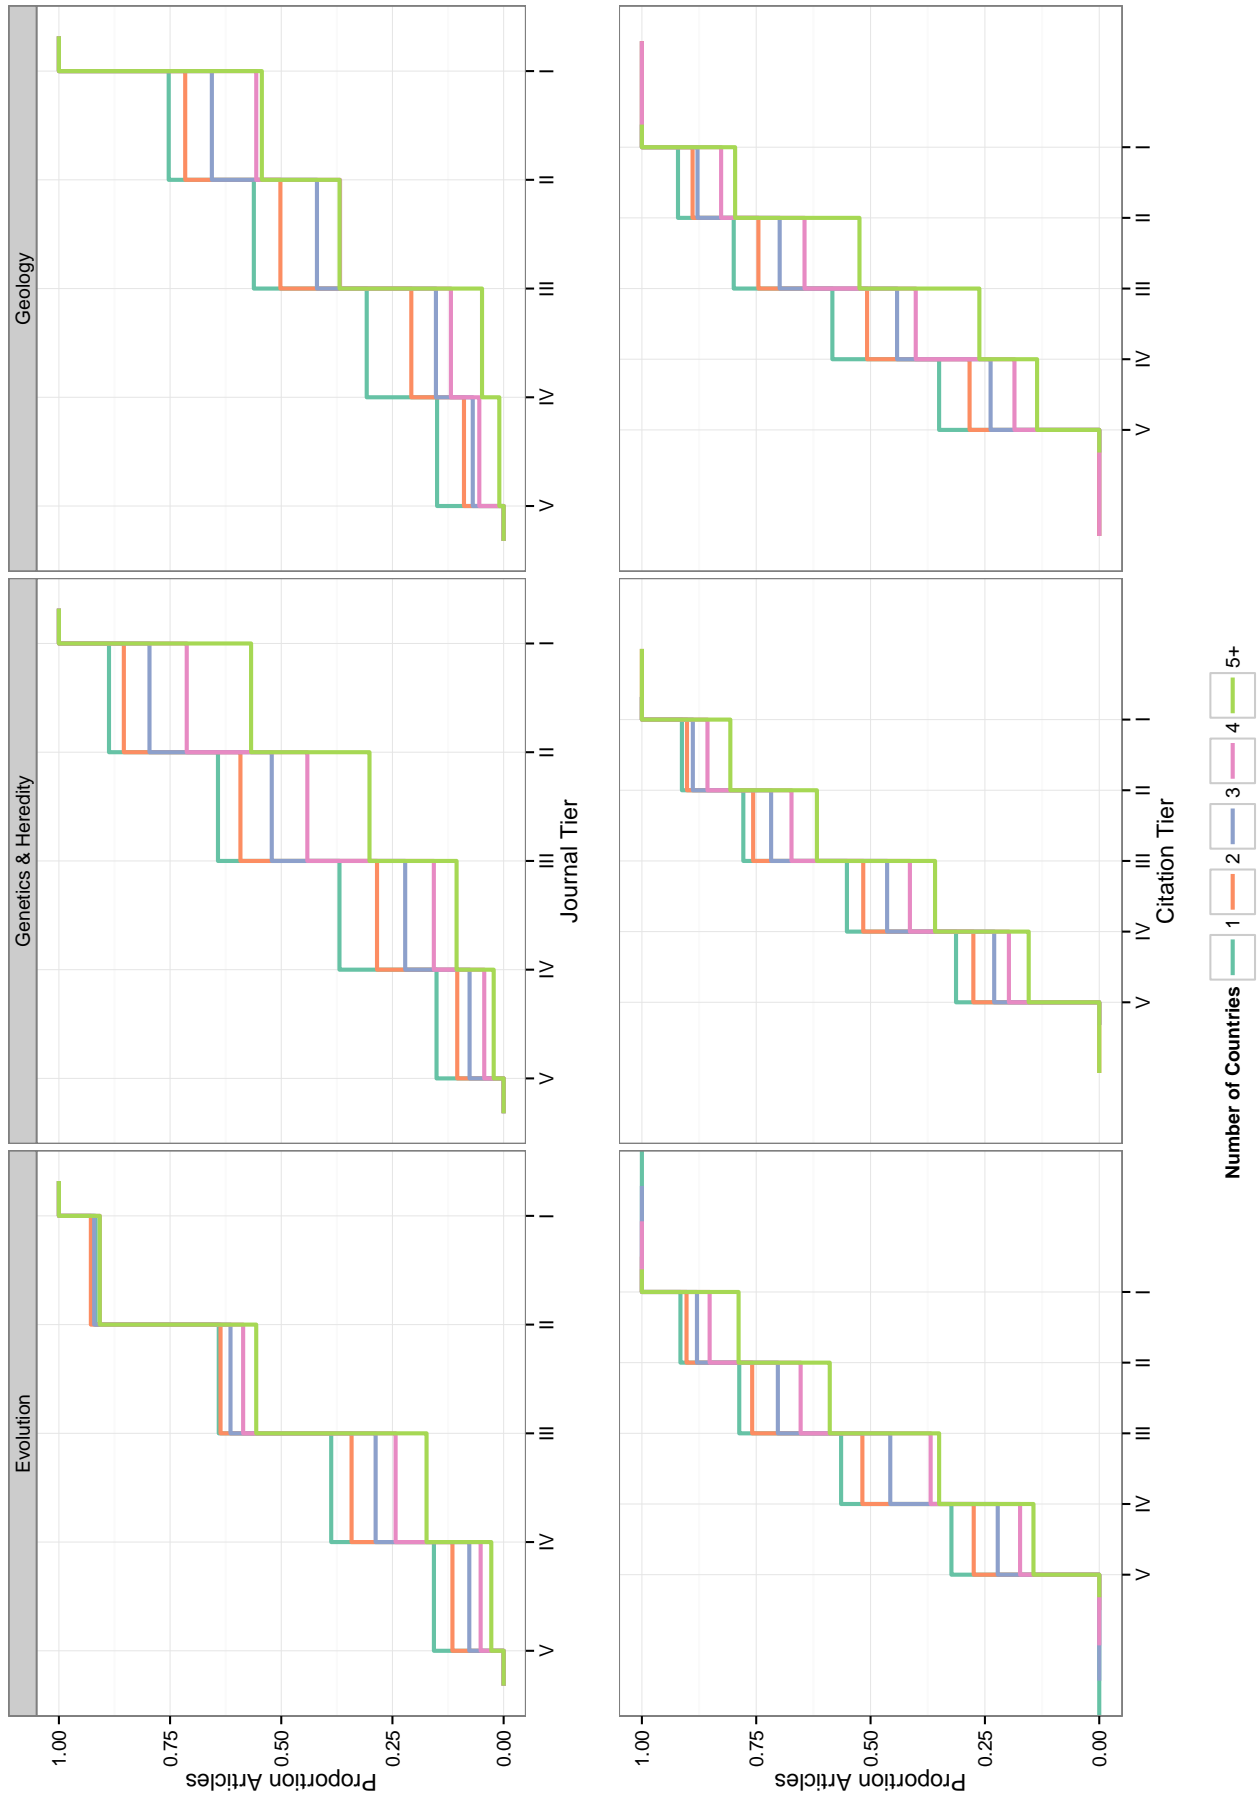

(b)

Figure S1

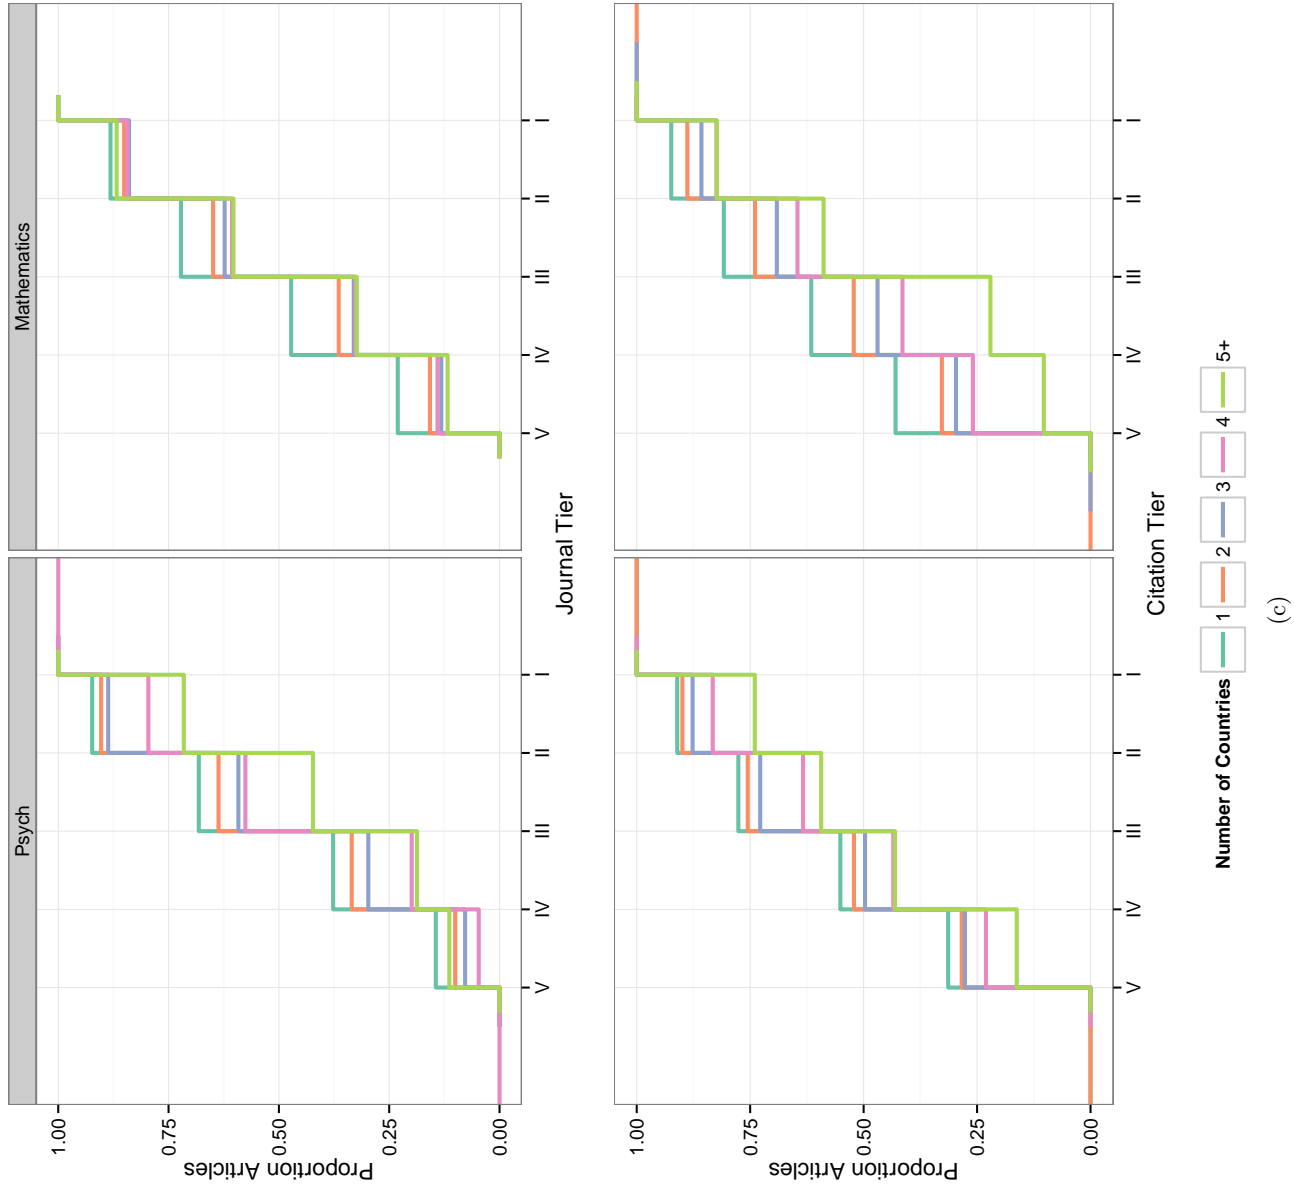

Figure S1: As Figure 1 in main text. The empirical cumulative distribution functions for journal placement (top) and citation performance (bottom) tiers have been plotted for each field. Articles are grouped according to the number of countries included in the affiliation.

Citations

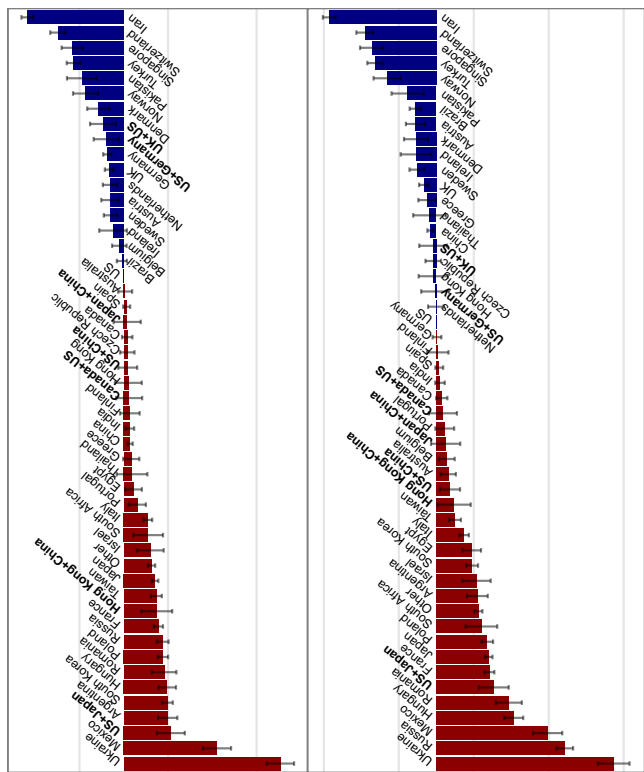

Journals

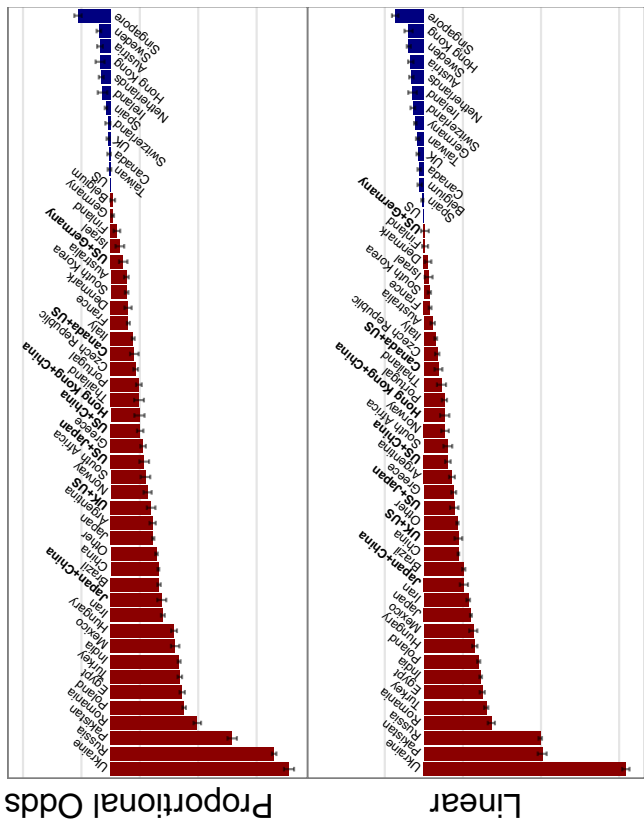

(a) Analytic Chemistry

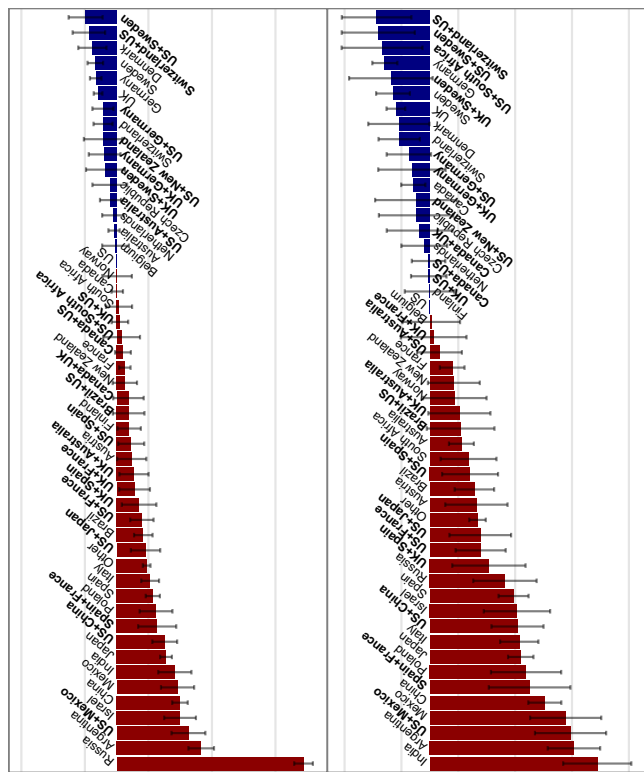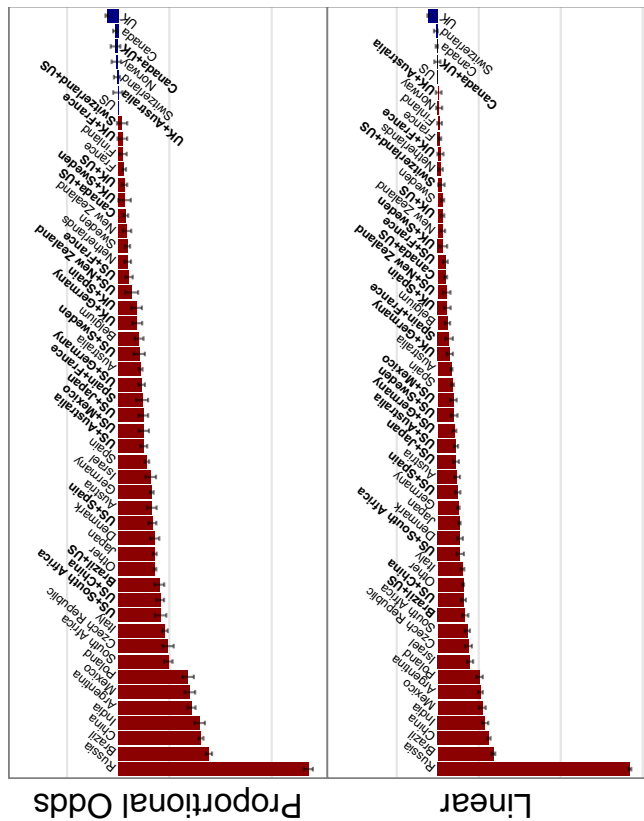

(b) Evolution

Figure S2

Citations

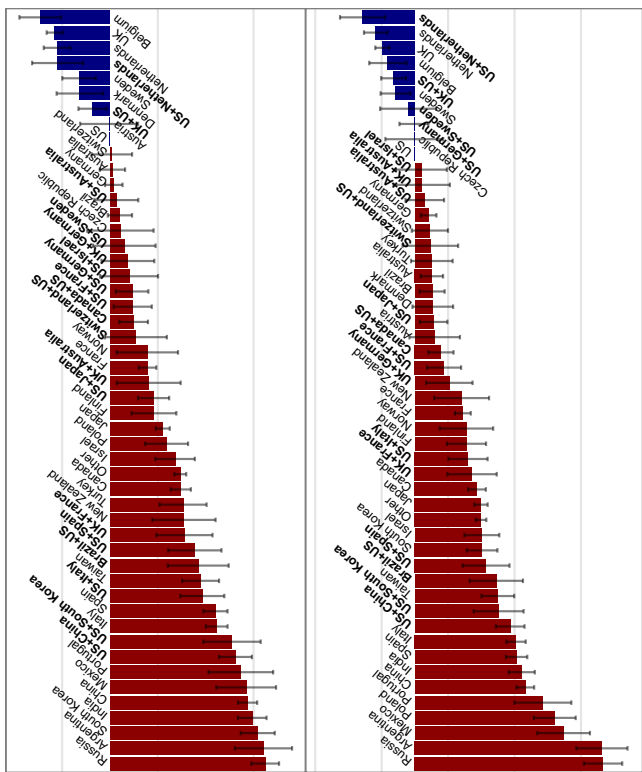

Journals

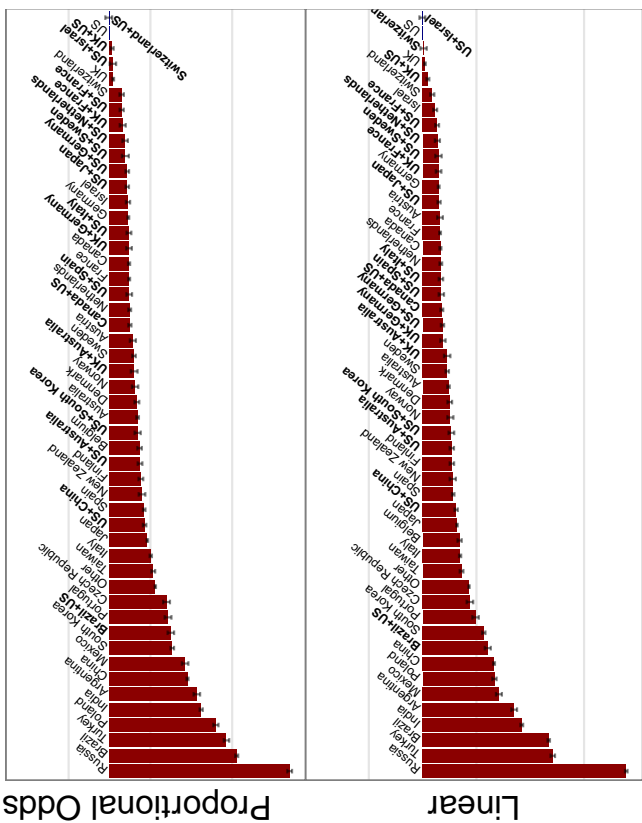

(c) Genetics & Heredity

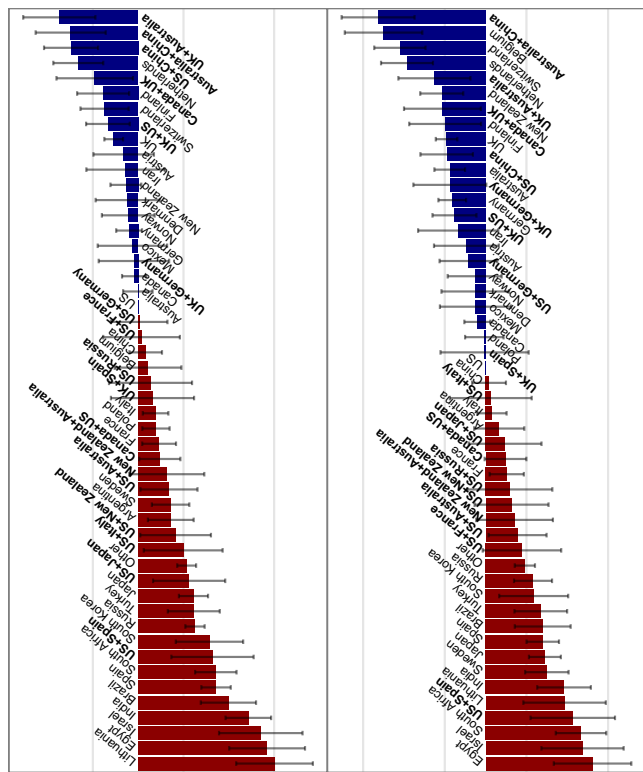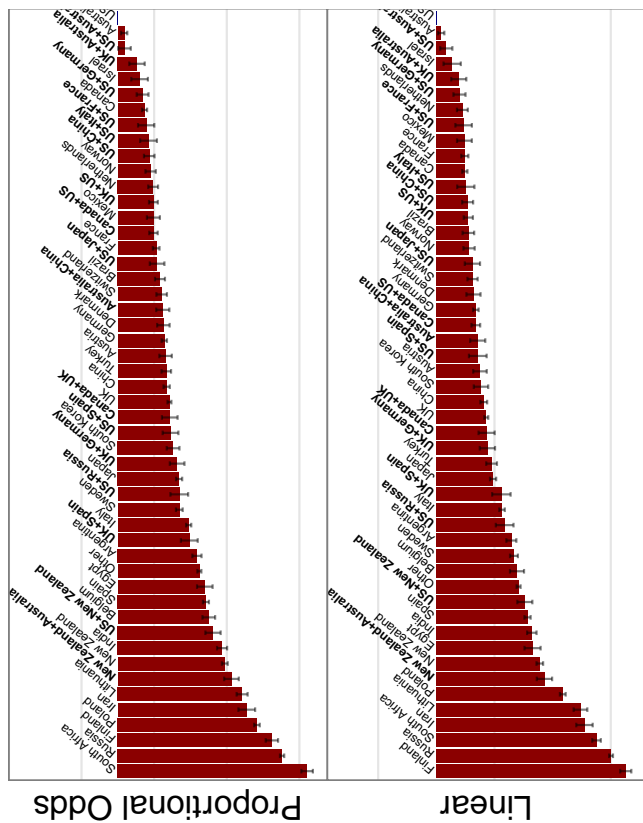

(d) Geology

Figure S2

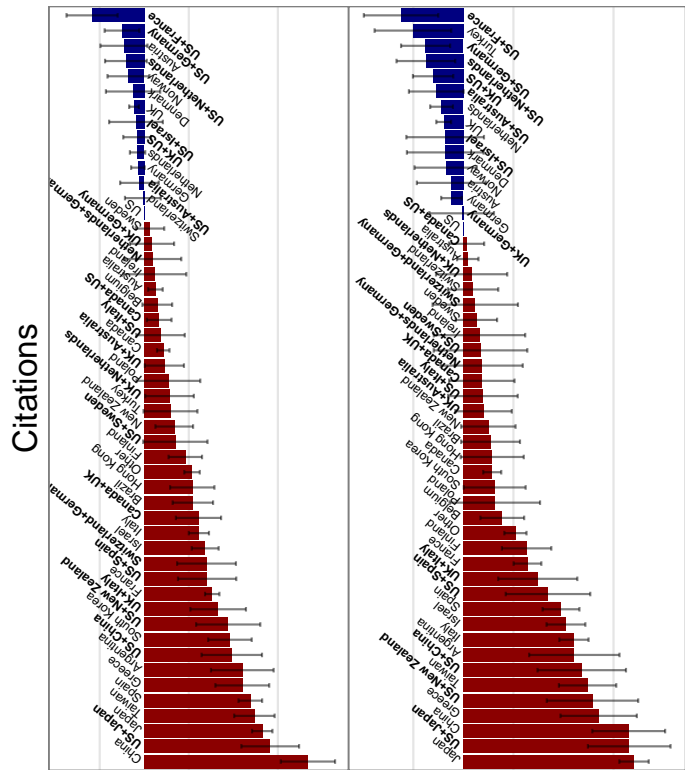

(e) Psychology

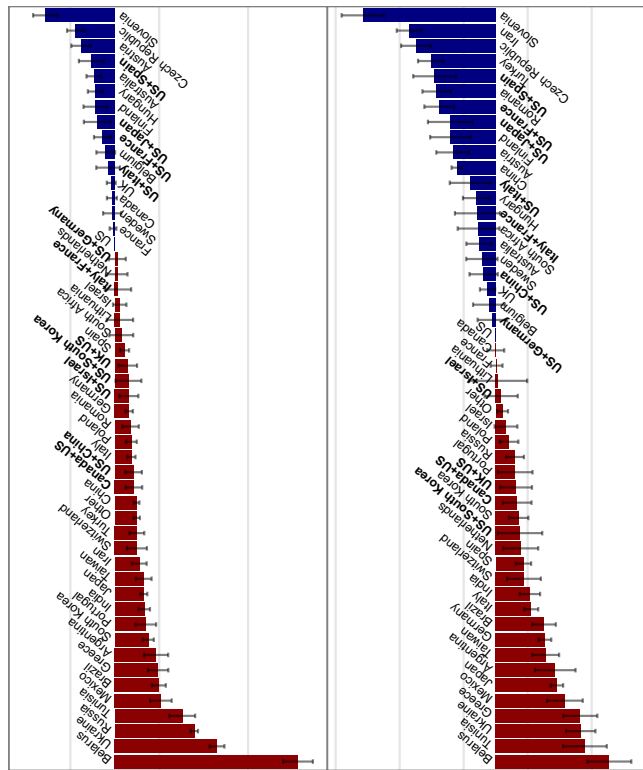

(f) Mathematics

Figure S2

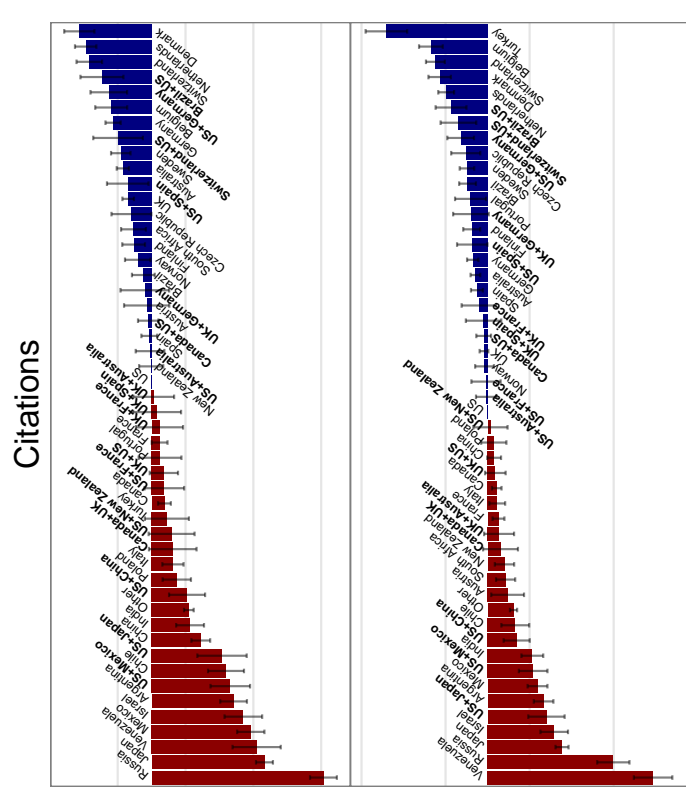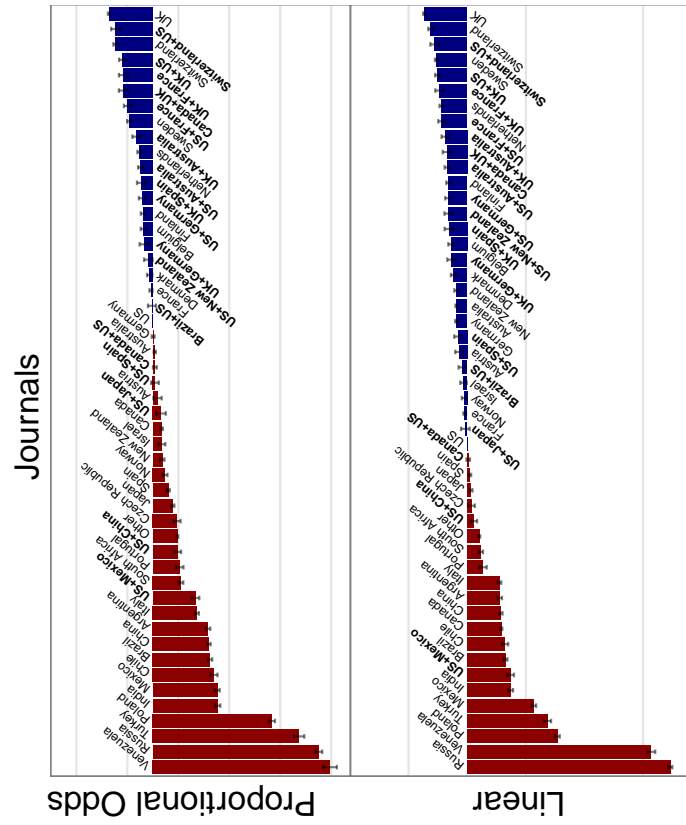

(g) Ecology

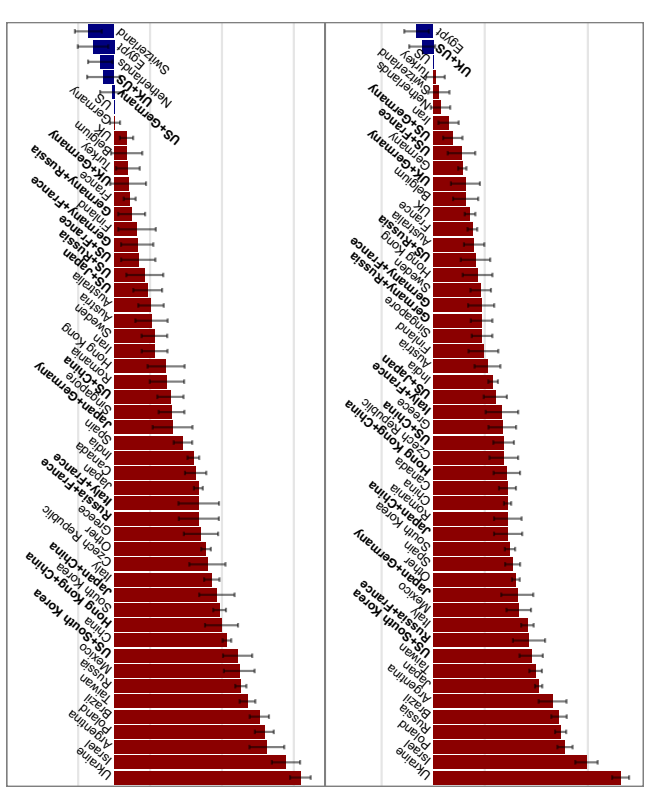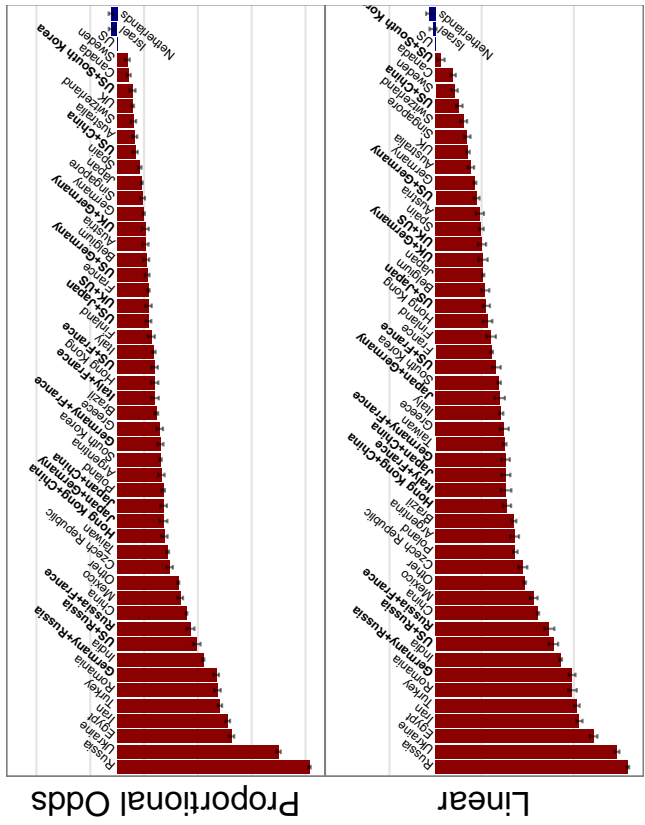

(h) Condensed-Matter Physics

Figure S2: As figure 2 in main text. Effect of country of affiliation on journal placement and citation performance. The color and length of the bars represent the strength of the effect compared to papers originating from the US. The coefficients are obtained fitting either a proportional-odds model (top) or linear model (bottom) to either journal placement (left) or citation performance (right) for each field.

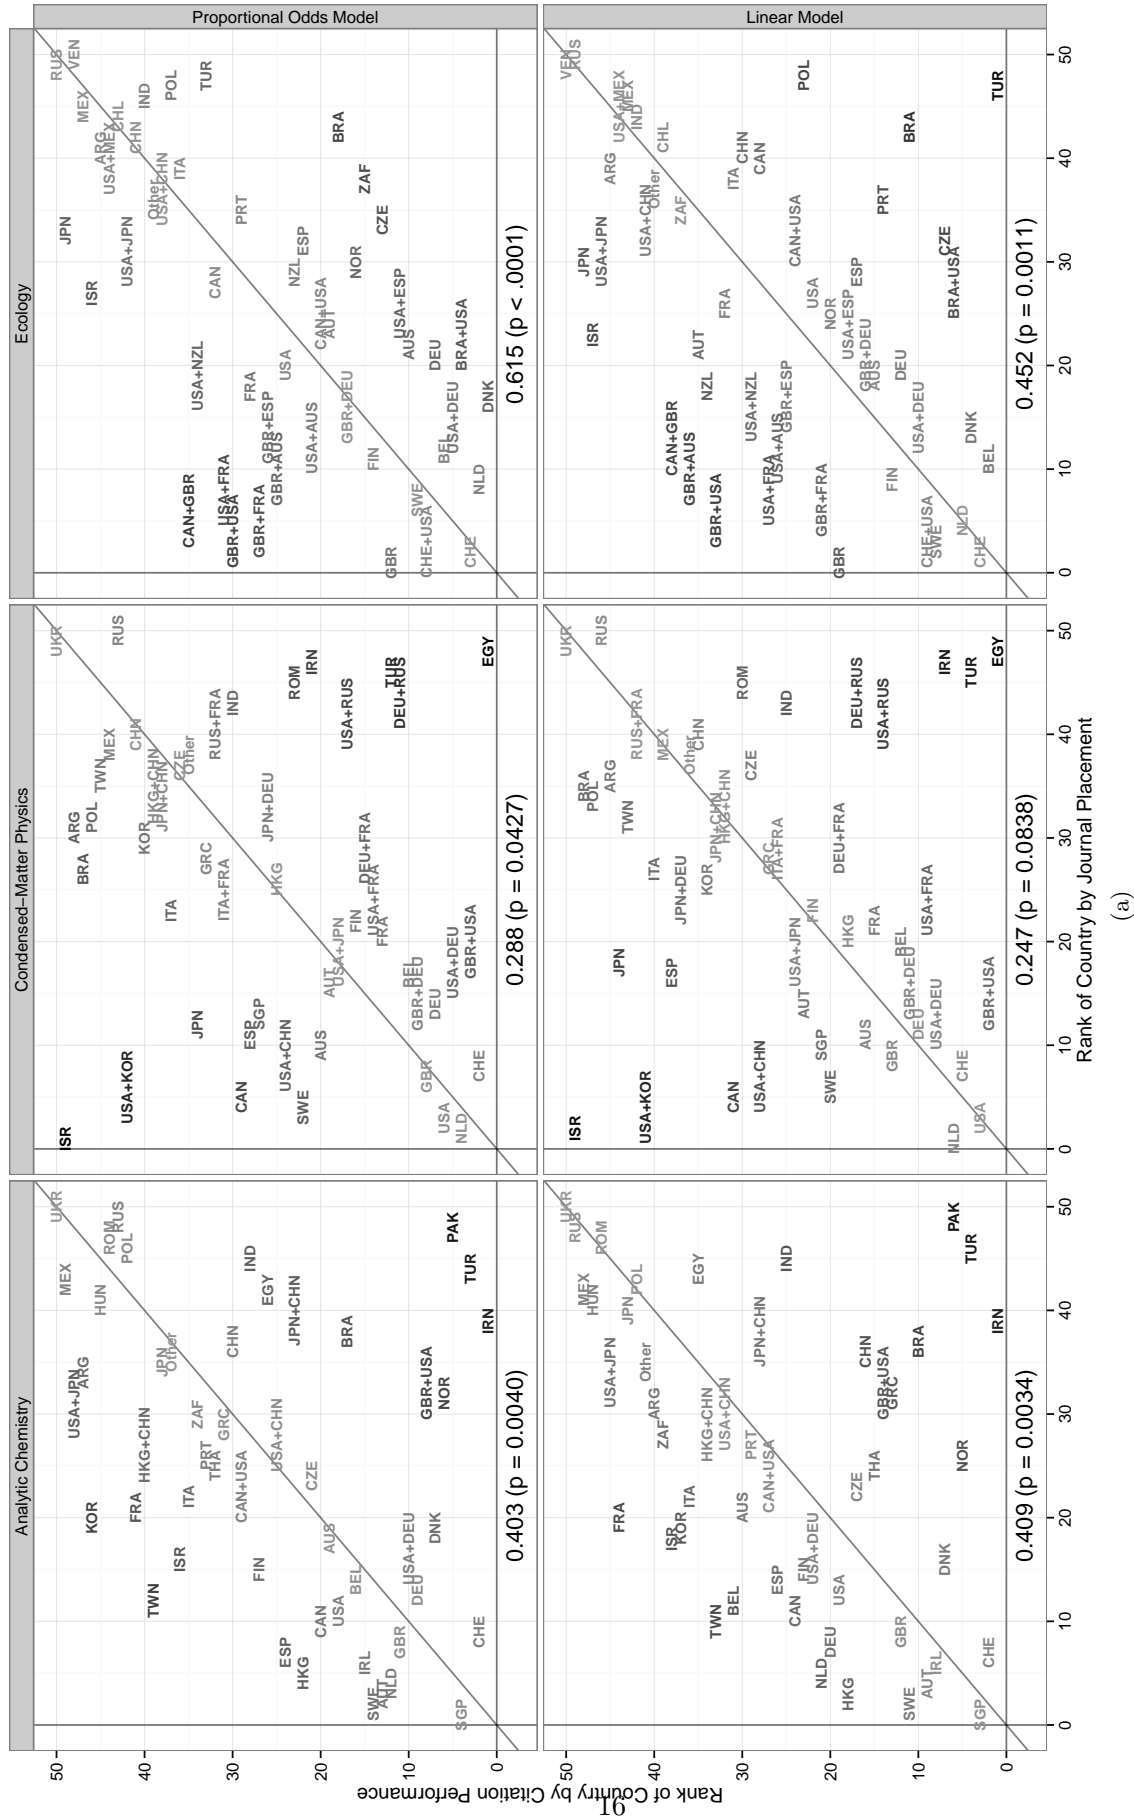

(a) Figure S3



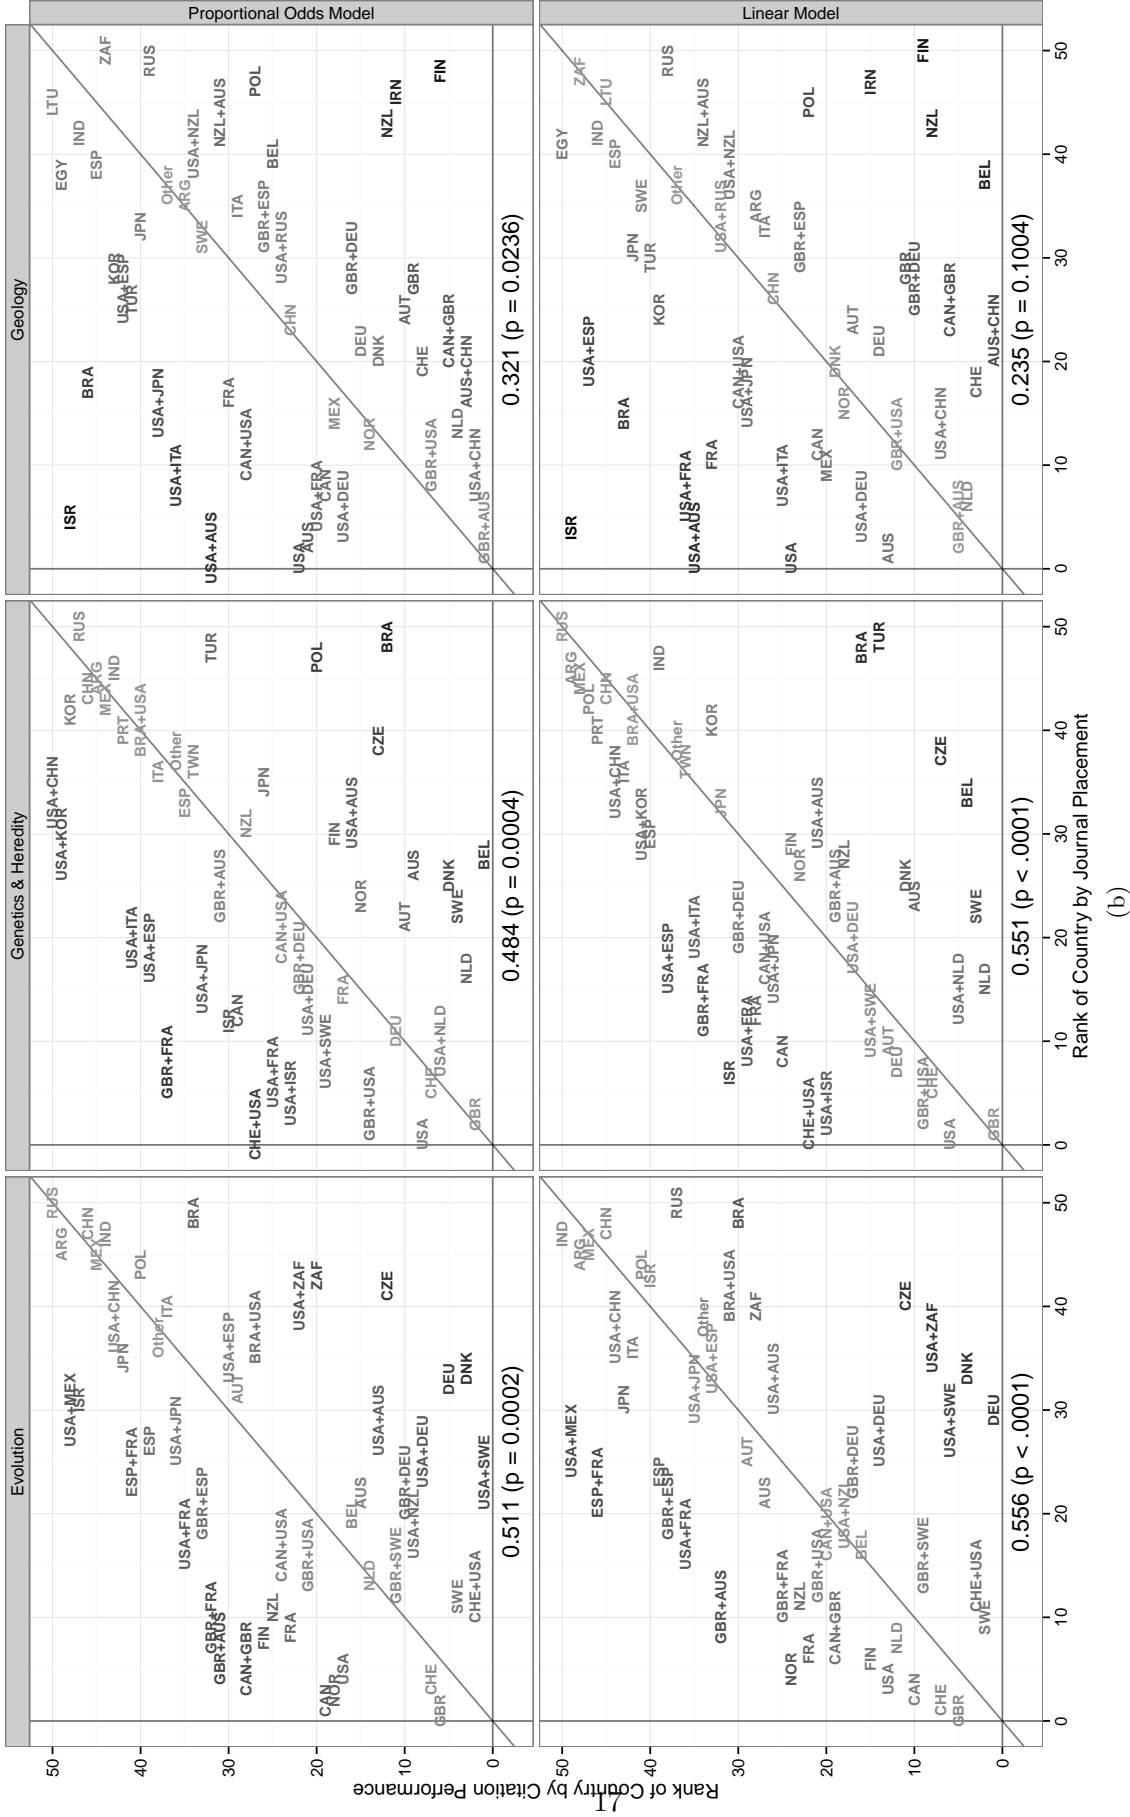

(b) Figure S3

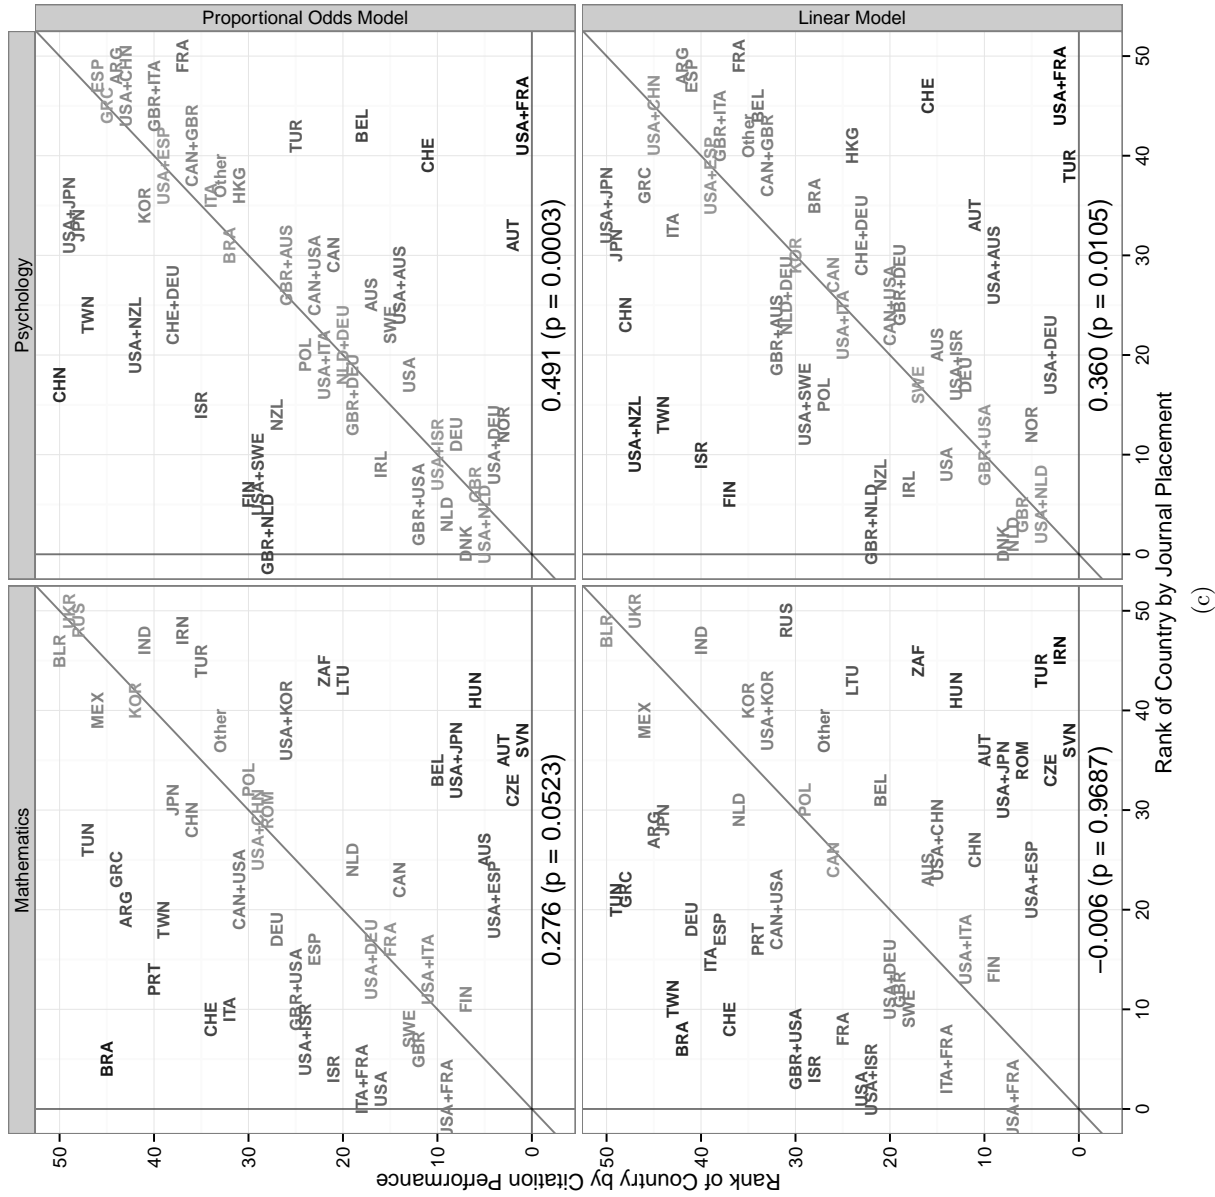

Figure S3: As figure 3 in main text. For each field, countries are positioned according to their ranks in journal placement and citation performance. Under each plot is the Spearman's Rho and associated p value for the relationship. In addition to the rankings for the proportional-odds model (top, shown in the main text for Ecology and Condensed-Matter Physics) the rankings for the linear model (bottom) are also plotted for each field.

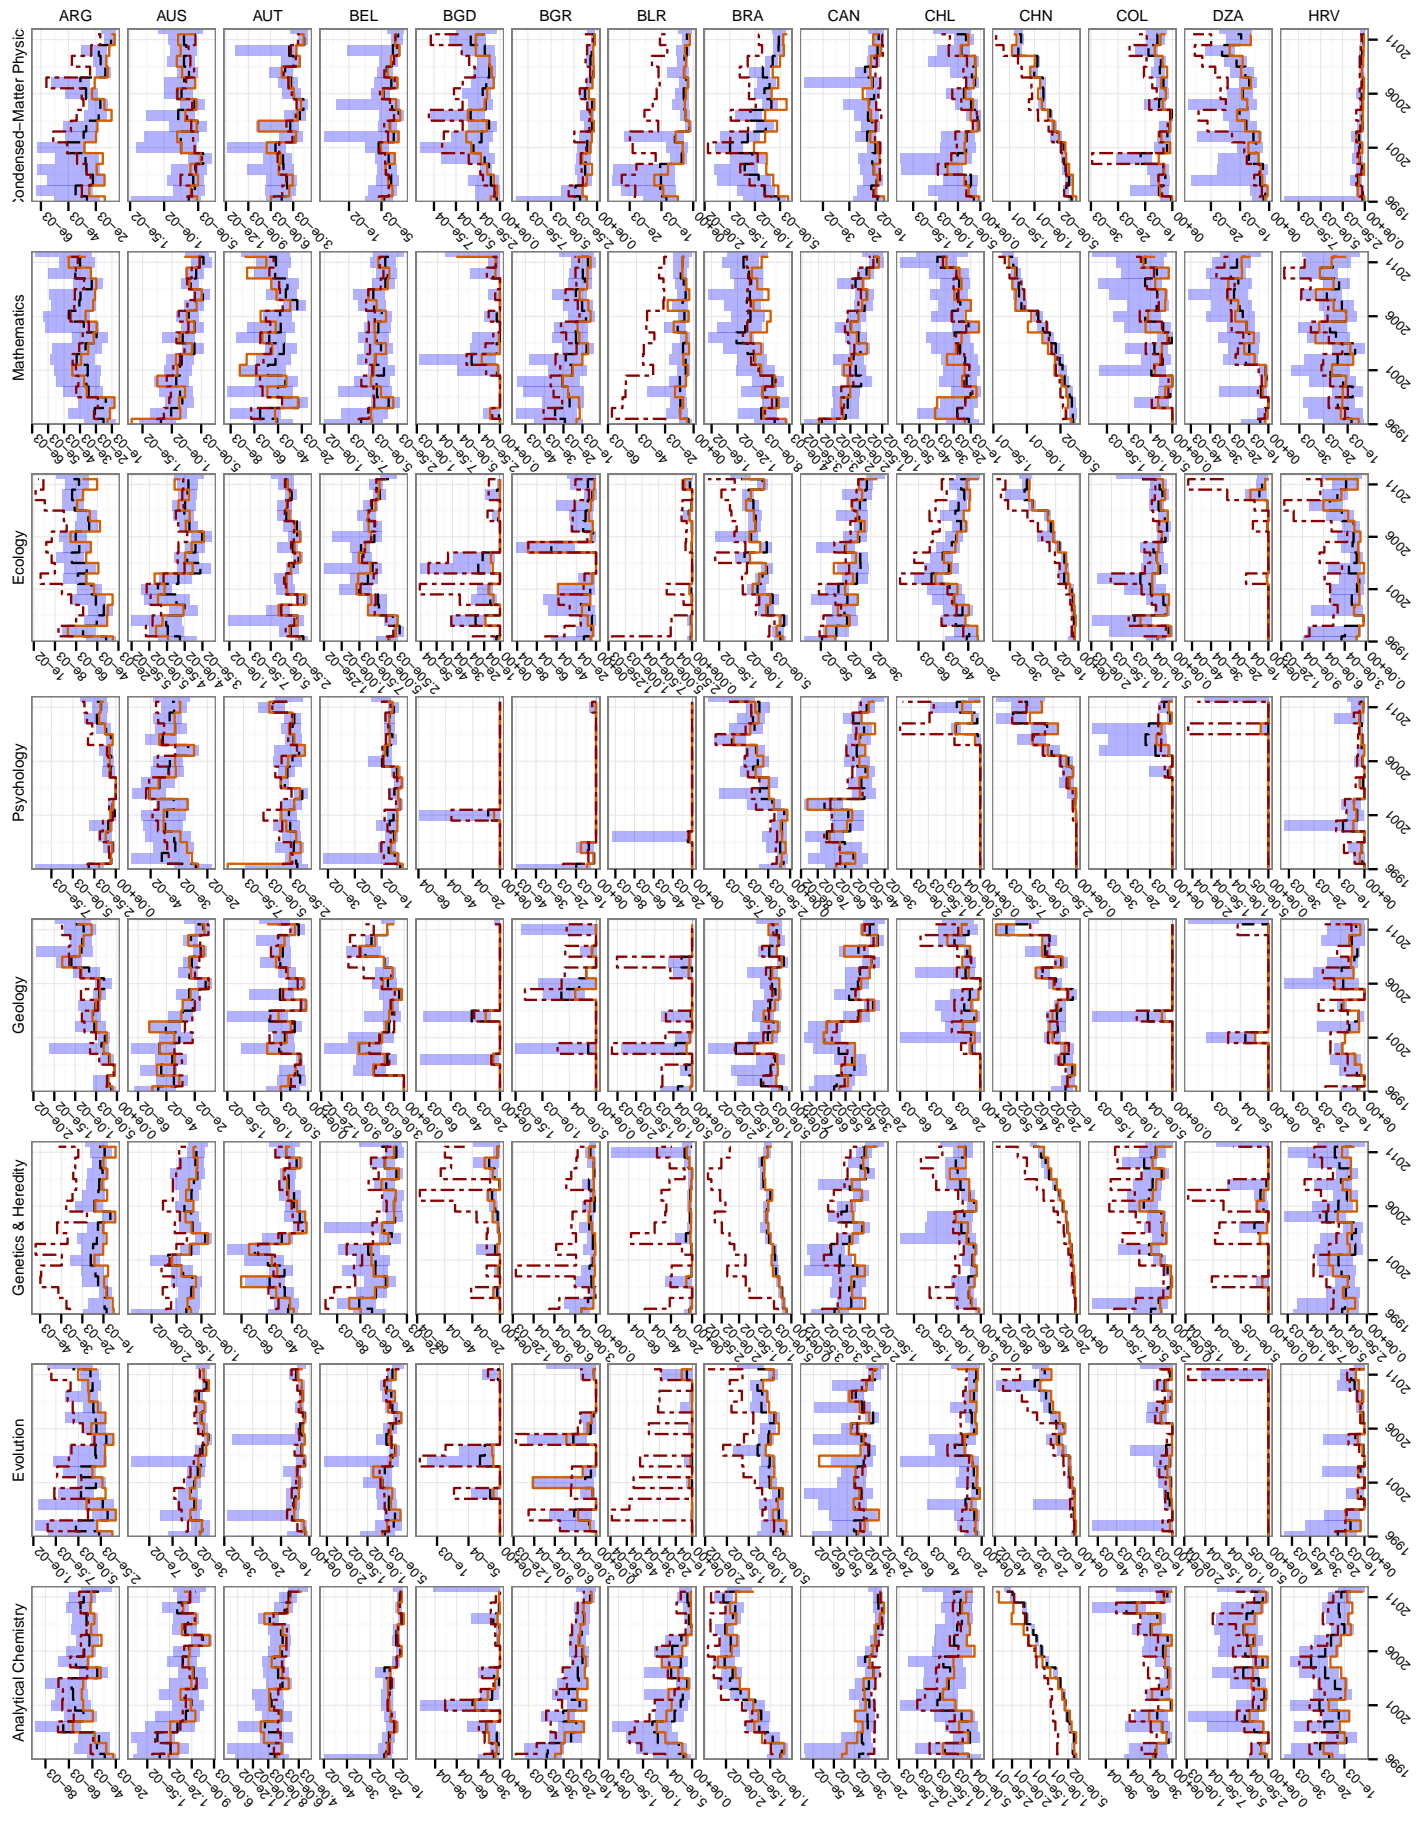

Figure S4

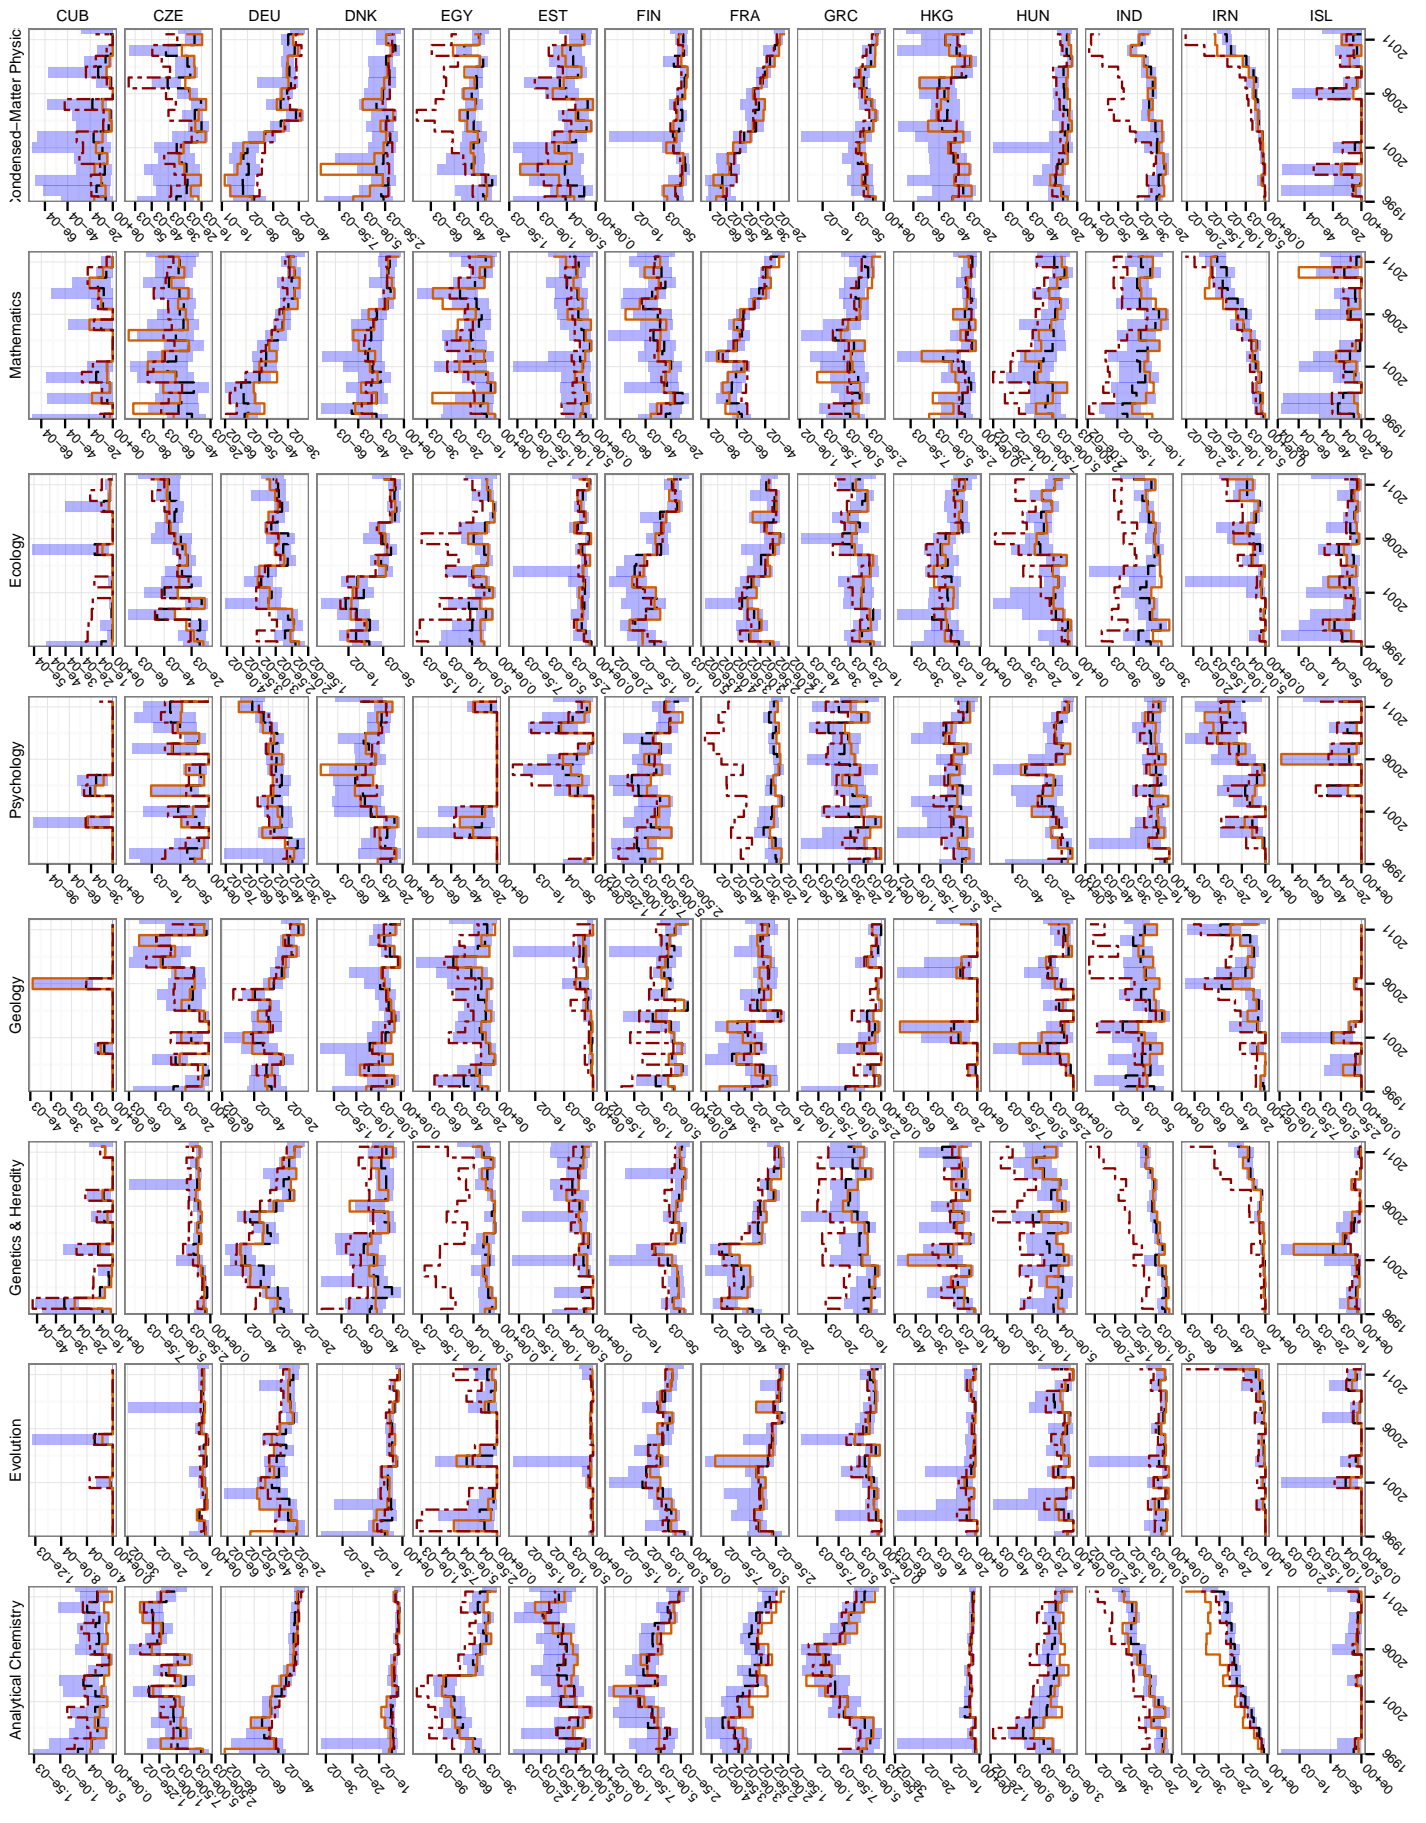

Figure S4

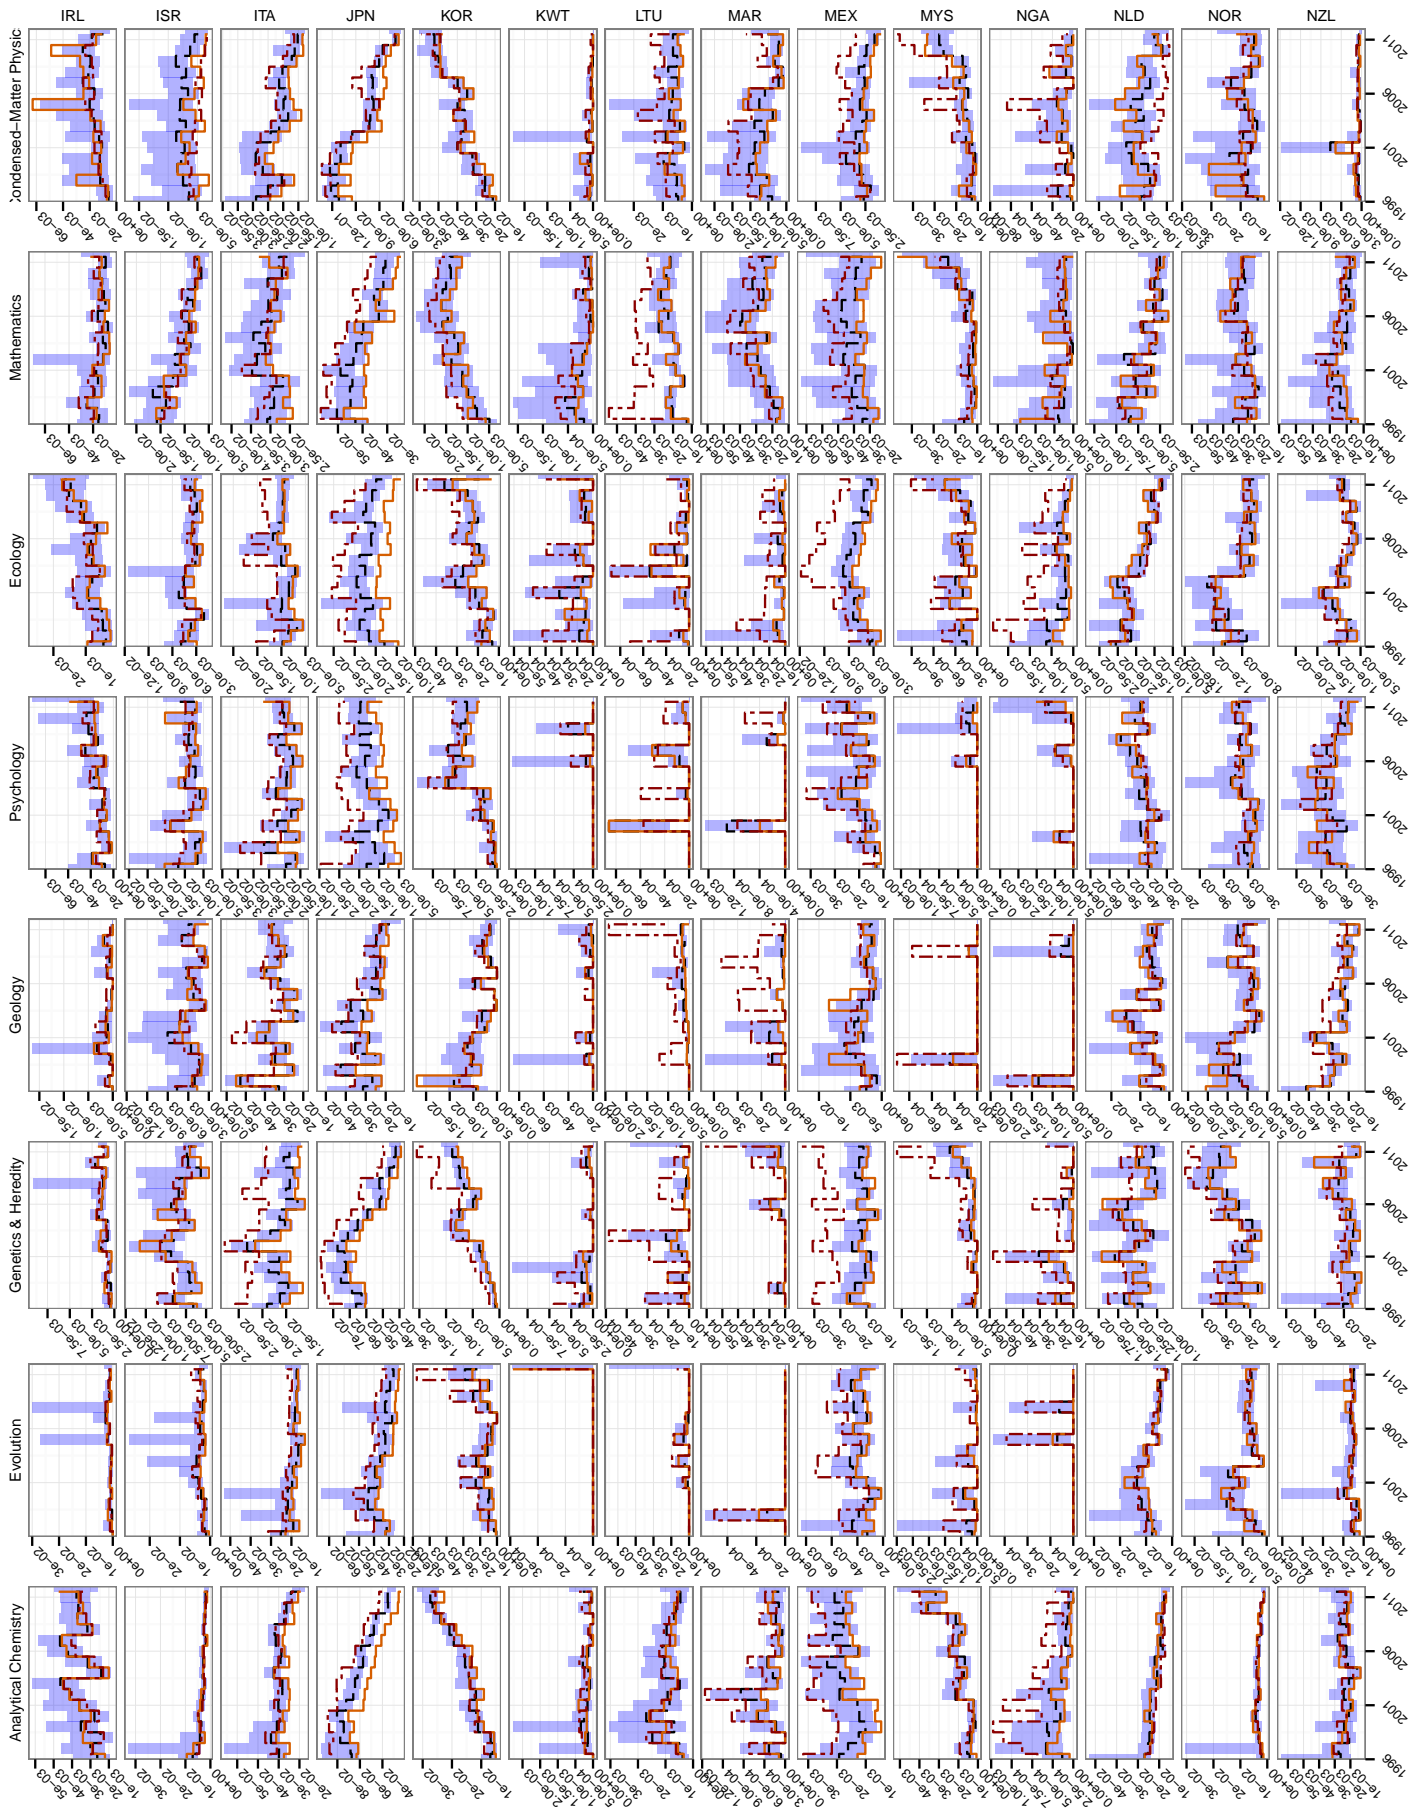

Figure S4

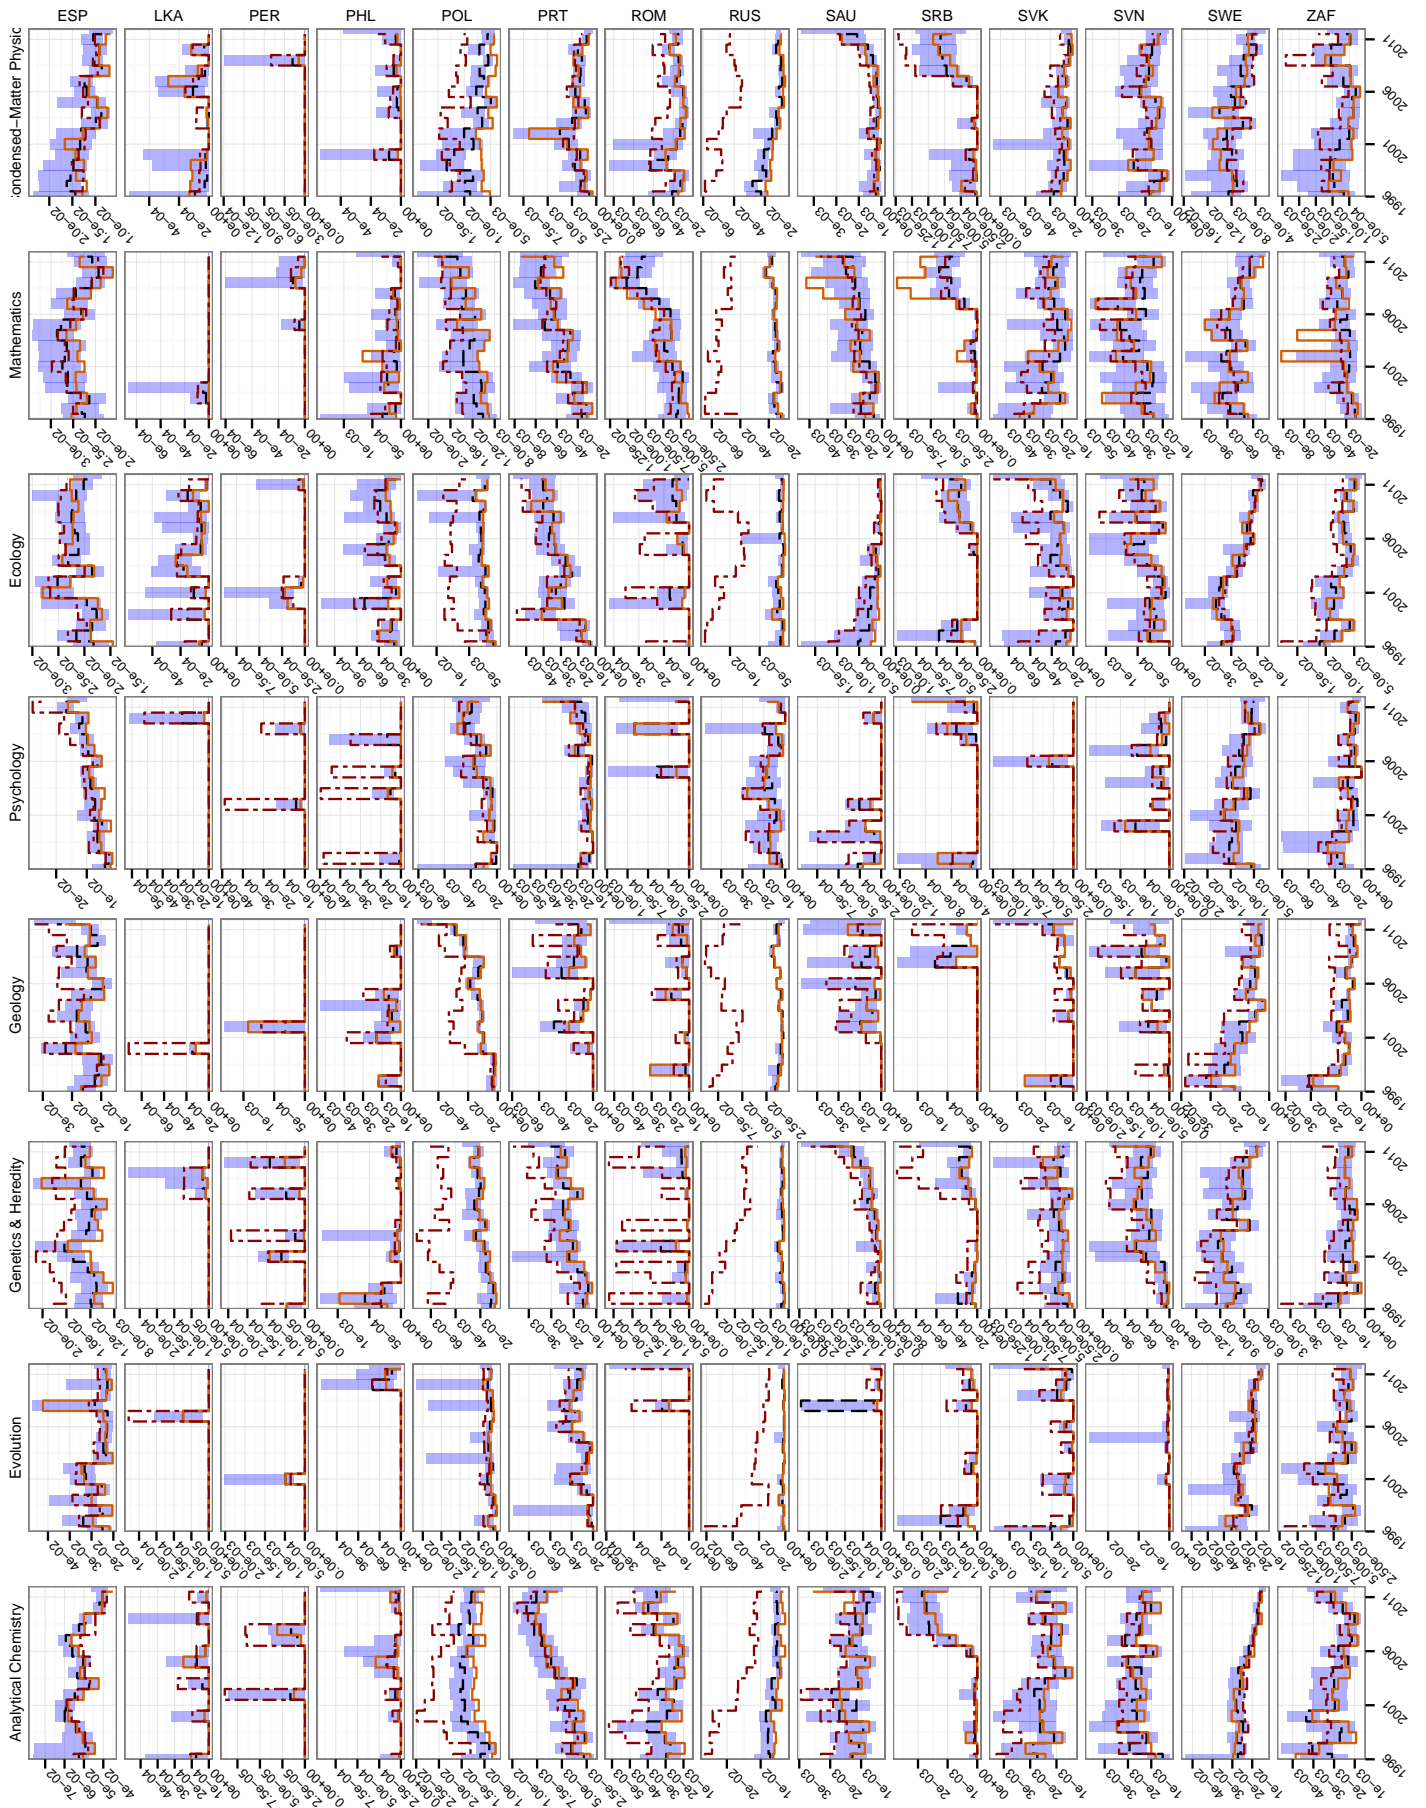

Figure S4

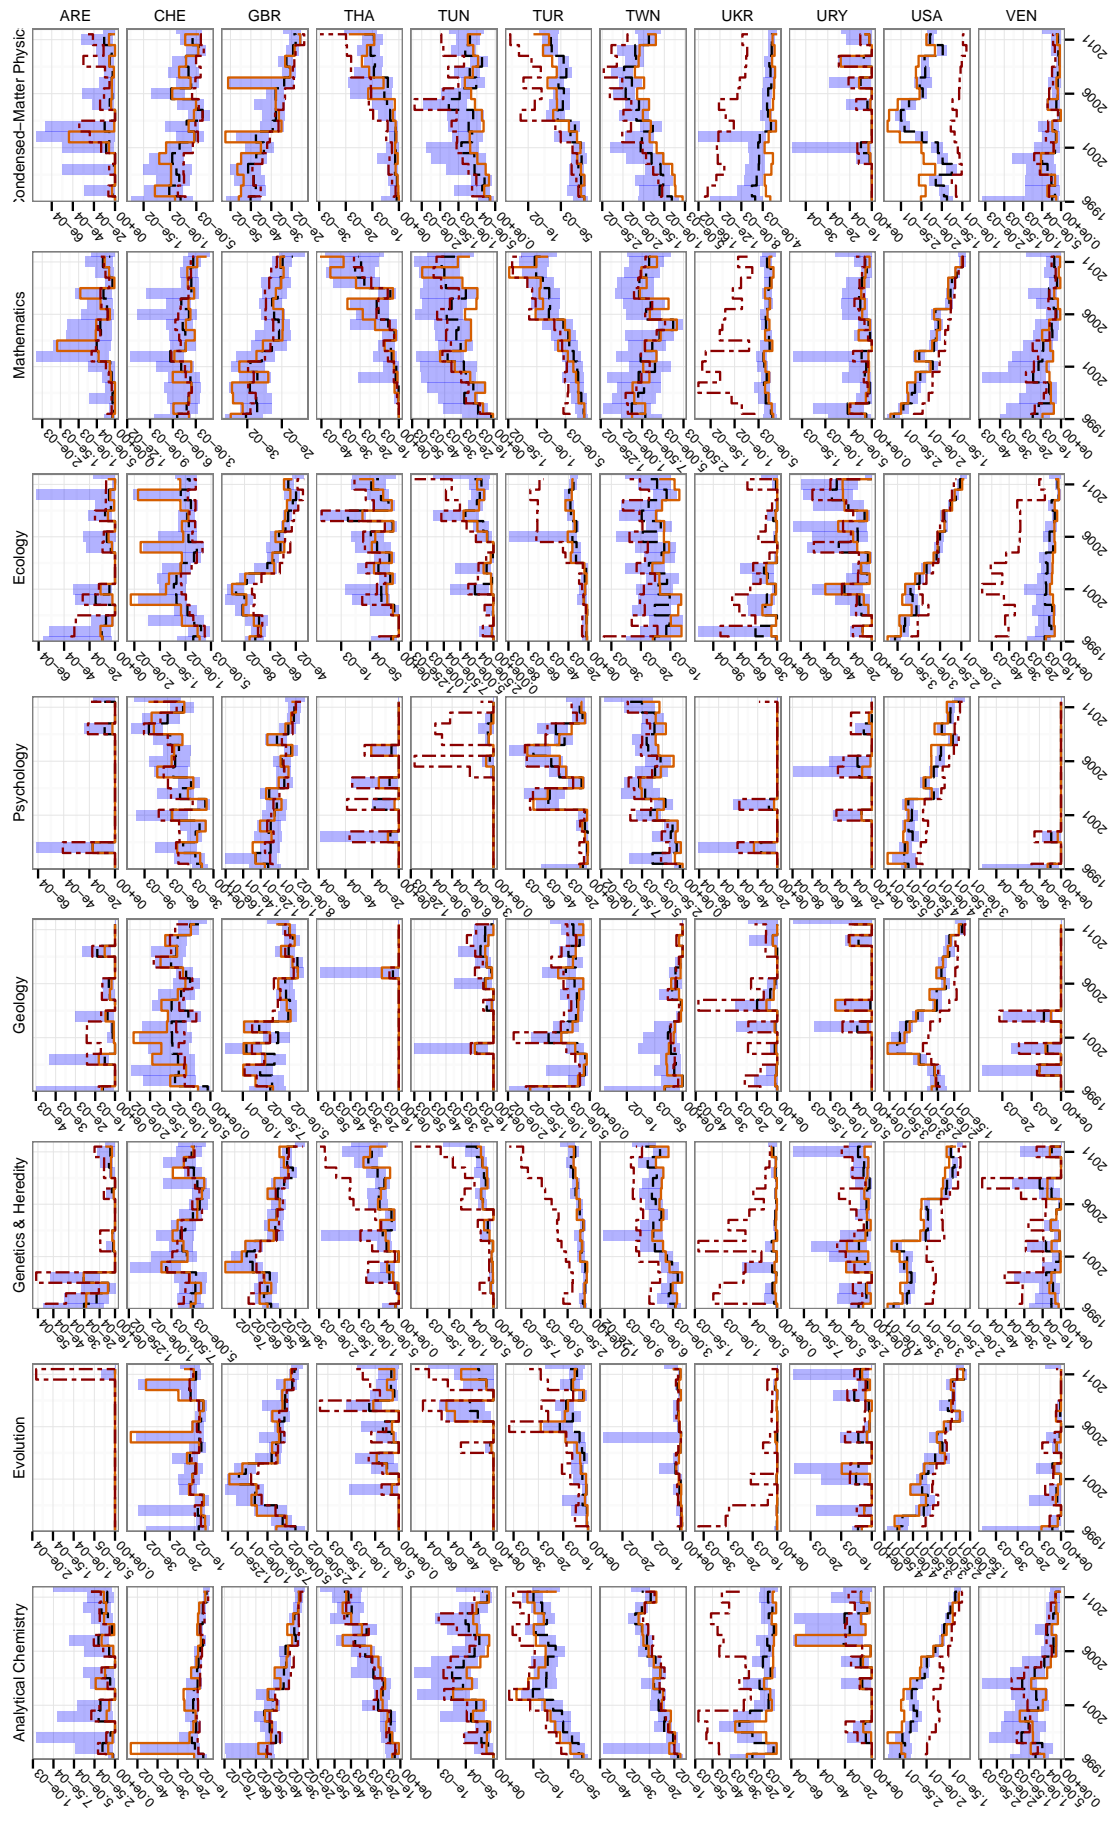

Figure S4: As Figure 4 in main text. Proportion of publications and citations through time. For each year, we computed the proportion of papers published (long-dashed red line) and the proportion of citations received as of May 2013 (solid orange line). We also report the expected proportion of citations (short-dashed black line) and corresponding (95%) confidence intervals (blue shades) obtained by randomization of citation records within Journal:Year combinations. All countries that have published in all eight fields analyzed are included.

| Field                    | Number of Journals | Number of Papers |         |
|--------------------------|--------------------|------------------|---------|
|                          |                    | Raw              | Refined |
| Condensed Matter Physics | 67                 | 290575           | 284208  |
| Mathematics              | 255                | 251417           | 240698  |
| Analytical Chemistry     | 71                 | 224957           | 220092  |
| Genetics & Heredity      | 146                | 212788           | 201315  |
| Ecology                  | 130                | 174258           | 170461  |
| Evolution                | 45                 | 61922            | 59253   |
| Psychology               | 72                 | 60203            | 58011   |
| Geology                  | 44                 | 26756            | 25709   |
| TOTAL                    | 802                | 1247216          |         |

Table S1: Summary of number of papers and journals per field included in this analysis.



| <u>Linear Model</u>            |           |         |         |           |          |         |         |       |         |
|--------------------------------|-----------|---------|---------|-----------|----------|---------|---------|-------|---------|
| Journals                       | Chemistry | Physics | Ecology | Evolution | Genetics | Geology | Math    | Psych |         |
| GDP                            | + 0.485   | + 0.652 | + 0.392 | + 0.36    | + 0.529  | + 0.214 | + 0.397 |       |         |
| Expend                         | + 0.303   | + 0.434 | + 0.397 |           | + 0.265  |         | + 0.194 |       |         |
| Grad                           | + 0.211   | + 0.517 | + 0.269 | + 0.382   | + 0.319  |         | + 0.143 |       |         |
| Gov                            | - 0.223   | - 0.182 | - 0.198 | - 0.273   |          |         |         |       |         |
| Wom                            |           |         |         |           |          |         |         |       |         |
| Pisa                           | + 0.221   | + 0.186 | + 0.239 | + 0.185   | + 0.168  |         |         |       |         |
| <u>Citations</u>               |           |         |         |           |          |         |         |       |         |
| GDP                            | + 0.225   | + 0.236 |         | + 0.426   | + 0.425  | + 0.204 |         |       | + 0.204 |
| Expend                         |           |         |         |           |          |         |         |       |         |
| Grad                           |           |         |         | + 0.277   |          |         |         |       |         |
| Gov                            | - 0.222   | - 0.16  |         | - 0.35    | - 0.395  |         |         |       |         |
| Wom                            |           |         |         |           |          |         |         |       |         |
| Pisa                           |           |         |         | + 0.376   | + 0.151  |         |         |       |         |
| <u>Proportional Odds Model</u> |           |         |         |           |          |         |         |       |         |
| <u>Journals</u>                |           |         |         |           |          |         |         |       |         |
| GDP                            | + 0.454   | + 0.519 | + 0.509 | + 0.518   | + 0.616  | + 0.272 | + 0.425 |       |         |
| Expend                         | + 0.33    | + 0.39  | + 0.375 |           | + 0.278  |         | + 0.196 |       |         |
| Grad                           | + 0.252   | + 0.481 | + 0.36  | + 0.432   | + 0.359  |         | + 0.134 |       |         |
| Gov                            | - 0.288   |         | - 0.195 | - 0.272   | - 0.187  |         |         |       |         |
| Wom                            |           |         |         |           |          |         |         |       |         |
| Pisa                           | + 0.194   | + 0.15  | + 0.306 | + 0.225   | + 0.16   |         |         |       |         |
| <u>Citations</u>               |           |         |         |           |          |         |         |       |         |
| GDP                            | + 0.251   | + 0.422 | + 0.294 | + 0.369   | + 0.462  | + 0.22  | + 0.129 |       | + 0.492 |
| Expend                         |           |         |         |           |          |         |         |       |         |
| Grad                           |           |         |         | + 0.165   |          |         |         |       |         |
| Gov                            | - 0.201   | - 0.245 |         | - 0.288   | - 0.235  |         |         |       |         |
| Wom                            |           |         |         |           |          |         |         |       |         |
| Pisa                           |           | + 0.164 | + 0.327 | + 0.259   |          |         |         |       |         |

Table S2: Summary of significant ( $p < 0.05$ ) results for linear regressions for various national statistics. Statistic codes are: GDP - *per capita* Gross Domestic Product, Expend - percent Gross Domestic Product spent on research & development, Grad - percent graduation rate, Gov - percent of researchers that are government employees, Wom - percent of researchers who are female, and Pisa - Programme for International Student Assessment (PISA) math exam scores. Sign of relationship is indicated with either '+' or '-', followed by the Spearman's Rho for the relationship.

| Field                    | Statistical Model | Baseline   |                       | With Affiliations |       |           |                  |         |
|--------------------------|-------------------|------------|-----------------------|-------------------|-------|-----------|------------------|---------|
|                          |                   | Resp. Var. | $R^2$                 | AIC               | $R^2$ | AIC       | $\Delta$ AIC (%) |         |
| Analytical Chemistry     | Linear            | Journals   | 0.125                 | 419639.35         | 0.188 | 403535.46 | -16103.89        | -3.84%  |
|                          | Prop. Odds        | Citations  | 0.418                 | 578150.12         | 0.422 | 576521.59 | -1628.53         | -0.28%  |
|                          |                   | Journals   |                       | 662201.26         |       | 645614.13 | -16587.13        | -2.50%  |
|                          |                   | Citations  |                       | 658180.81         |       | 657028.35 | -1152.46         | -0.18%  |
| Evolution                | Linear            | Journals   | 0.068                 | 116252.74         | 0.325 | 97299.32  | -18953.42        | -16.30% |
|                          | Prop. Odds        | Citations  | 0.535                 | 148947.06         | 0.538 | 148698.22 | -248.84          | -0.17%  |
|                          |                   | Journals   |                       | 177875.82         |       | 170650.01 | -7225.81         | -4.06%  |
|                          |                   | Citations  |                       | 178005.4          |       | 177222.6  | -782.8           | -0.44%  |
| Genetics & Heredity      | Linear            | Journals   | 0.108                 | 434292.68         | 0.279 | 391363.11 | -42929.57        | -9.88%  |
|                          | Prop. Odds        | Citations  | 0.522                 | 531572.65         | 0.524 | 530834.36 | -738.29          | -0.14%  |
|                          |                   | Journals   |                       | 605948.38         |       | 576136.01 | -29812.37        | -4.92%  |
|                          |                   | Citations  |                       | 611401.45         |       | 610482.16 | -919.29          | -0.15%  |
| Geology                  | Linear            | Journals   | 0.026                 | 56260.08          | 0.341 | 46321.01  | -9939.07         | -17.67% |
|                          | Prop. Odds        | Citations  | 0.368                 | 73480.81          | 0.373 | 73361.13  | -119.68          | -0.16%  |
|                          |                   | Journals   |                       | 79919.43          |       | 69996.78  | -9922.65         | -12.42% |
|                          |                   | Citations  |                       | 76344.75          |       | 76179.76  | -164.99          | -0.22%  |
| Psychology               | Linear            | Journals   | 0.113                 | 117837.73         | 0.317 | 102827.35 | -15010.38        | -12.74% |
|                          | Prop. Odds        | Citations  | 0.514                 | 154627.5          | 0.518 | 154311.16 | -316.34          | -0.20%  |
|                          |                   | Journals   |                       | 169962.73         |       | 166157.78 | -3804.95         | -2.24%  |
|                          |                   | Citations  |                       | 175468.85         |       | 175020.25 | -448.6           | -0.26%  |
| Ecology                  | Linear            | Journals   | 0.115                 | 392632.08         | 0.217 | 371702.65 | -20929.43        | -5.33%  |
|                          | Prop. Odds        | Citations  | 0.544                 | 423996.08         | 0.546 | 423428.58 | -567.5           | -0.13%  |
|                          |                   | Journals   |                       | 506280.71         |       | 491089.68 | -15191.03        | -3.00%  |
|                          |                   | Citations  |                       | 513980.09         |       | 513206.64 | -773.45          | -0.15%  |
| Condensed-Matter Physics | Linear            | Journals   | 0.128                 | 640524.53         | 0.223 | 607944.71 | -32579.82        | -5.09%  |
|                          | Prop. Odds        | Citations  | 0.364                 | 804716.22         | 0.369 | 802720.95 | -1995.27         | -0.25%  |
|                          |                   | Journals   |                       | 799488.42         |       | 759781.24 | -39707.18        | -4.97%  |
|                          |                   | Citations  |                       | 859135.93         |       | 856915.34 | -2220.59         | -0.26%  |
| Mathematics              | Linear            | Journals   | 0.087                 | 358447.37         | 0.166 | 336870.14 | -21577.23        | -6.02%  |
|                          | Prop. Odds        | Citations  | 0.314                 | 602594.42         | 0.316 | 601978.75 | -615.67          | -0.10%  |
|                          |                   | Journals   |                       | 739383.98         |       | 721226.65 | -18157.33        | -2.46%  |
|                          |                   | Citations  |                       | 696726.86         |       | 695633.82 | -1093.04         | -0.16%  |
|                          |                   |            | Average for Journals  |                   |       |           | -7.09%           |         |
|                          |                   |            | Average for Citations |                   |       |           | -0.20%           |         |
|                          |                   |            | Average for LM        |                   |       |           | -4.89%           |         |
|                          |                   |            | Average for POM       |                   |       |           | -2.40%           |         |

Table S3: Summary of the fit of statistical models. For each field, two models were fit (a linear model: ‘Linear’, ‘LM’, and a proportional odds model: ‘Prop. Odds’, ‘POM’). Each model was fit to both the citation and journal tier data. Especially note the final column, which shows the percent improvement in the Akaike information criterion (AIC) when individual countries’ effects are included in the model.

| Country        | ISO-3 | English? | Country      | ISO-3 | English? | Country              | ISO-3 | English? | Country              | ISO-3 | English? |
|----------------|-------|----------|--------------|-------|----------|----------------------|-------|----------|----------------------|-------|----------|
| Algeria        | DZA   | No       | Hong Kong    | HKG   | No       | Portugal             | PRT   | No       | Portugal             | PRT   | No       |
| Argentina      | ARG   | No       | Hungary      | HUN   | No       | Romania              | ROM   | No       | Romania              | ROM   | No       |
| Australia      | AUS   | Yes      | Iceland      | ISL   | No       | Russia               | RUS   | No       | Russia               | RUS   | No       |
| Austria        | AUT   | No       | India        | IND   | Yes      | Saudi Arabia         | SAU   | No       | Saudi Arabia         | SAU   | No       |
| Bangladesh     | BGD   | No       | Iran         | IRN   | No       | Serbia               | SRB   | No       | Serbia               | SRB   | No       |
| Belarus        | BLR   | No       | Ireland      | IRL   | Yes      | Slovakia             | SVK   | No       | Slovakia             | SVK   | No       |
| Belgium        | BEL   | No       | Israel       | ISR   | No       | Slovenia             | SVN   | No       | Slovenia             | SVN   | No       |
| Brazil         | BRA   | No       | Italy        | ITA   | No       | South Africa         | ZAF   | Yes      | South Africa         | ZAF   | Yes      |
| Bulgaria       | BGR   | No       | Japan        | JPN   | No       | Spain                | ESP   | No       | Spain                | ESP   | No       |
| Canada         | CAN   | Yes      | Korea, South | KOR   | No       | Sri Lanka            | LKA   | No       | Sri Lanka            | LKA   | No       |
| Chile          | CHL   | No       | Kuwait       | KWT   | No       | Sweden               | SWE   | No       | Sweden               | SWE   | No       |
| China          | CHN   | No       | Lithuania    | LTU   | No       | Switzerland          | CHE   | No       | Switzerland          | CHE   | No       |
| Colombia       | COL   | No       | Malaysia     | MYS   | No       | Taiwan               | TWN   | No       | Taiwan               | TWN   | No       |
| Croatia        | HRV   | No       | Mexico       | MEX   | No       | Thailand             | THA   | No       | Thailand             | THA   | No       |
| Cuba           | CUB   | No       | Morocco      | MAR   | No       | Tunisia              | TUN   | No       | Tunisia              | TUN   | No       |
| Czech Republic | CZE   | No       | Netherlands  | NLD   | No       | Turkey               | TUR   | No       | Turkey               | TUR   | No       |
| Denmark        | DNK   | No       | New Zealand  | NZL   | Yes      | Ukraine              | UKR   | No       | Ukraine              | UKR   | No       |
| Egypt          | EGY   | No       | Nigeria      | NGA   | Yes      | United Arab Emirates | ARE   | No       | United Arab Emirates | ARE   | No       |
| Estonia        | EST   | No       | Norway       | NOR   | No       | United Kingdom       | GBR   | Yes      | United Kingdom       | GBR   | Yes      |
| Finland        | FIN   | No       | Peru         | PER   | No       | United States        | USA   | Yes      | United States        | USA   | Yes      |
| France         | FRA   | No       | Philippines  | PHL   | Yes      | Uruguay              | URY   | No       | Uruguay              | URY   | No       |
| Germany        | DEU   | No       | Poland       | POL   | No       | Venezuela            | VEN   | No       | Venezuela            | VEN   | No       |
| Greece         | GRC   | No       |              |       |          |                      |       |          |                      |       |          |

Table S4: Lookup table for ISO-3 country codes used throughout the main text and supplementary information as well as an indication of which countries have English among their official languages.

## 5 Appendix A: Scopus Search Parameters

A list of field-specific journals and their Impact Factors was compiled for each of our eight fields from ISI Web of Knowledge Journal Citation Reports (Thomson Reuters). The data we analyzed can be obtained from SciVerse Scopus using an “Advanced search” of the form:

```
ISSN(XXXX-XXXX) AND PUBYEAR IS YYYY AND DOCTYPE(ar)
```

for each journal of interest, where XXXX-XXXX is replaced with a journal’s ISSN and YYYY with a year of interest. The final term sets the document type to only return “Articles.” This excludes the categories “Editorial”, “Erratum”, “Letter”, “Note”, “Review”, etc. and ensures that the downloaded records were original research articles, and not other types of documents. The results can be exported by first clicking on “Select all” and then “CSV export” (choosing “CSV” as the output format and “Citations, abstract and references” as the output type).

## References

- [1] Central Intelligence Agency. The world factbook. Accessed: May 2013.
- [2] International Organization for Standardization. Country codes - iso 3166. Accessed: May 2013.
- [3] Organisation for Economic Co-operation and Development. Oecd.stat.
- [4] Roosa Leimu and Julia Koricheva. What determines the citation frequency of ecological papers? *Trends in Ecol Evol*, 20(1):28–32, 2005.
- [5] R Development Core Team. *R: A Language and Environment for Statistical Computing*. R Foundation for Statistical Computing, Vienna, Austria, 2011. ISBN 3-900051-07-0.
- [6] R. H. B. Christensen. ordinal—regression models for ordinal data, 2-09. R package version 2012.09-11 <http://www.cran.r-project.org/package=ordinal/>.
- [7] Peter Mccullagh. Regression Models for Ordinal Data. *J R Stat Soc Series B Stat Methodol*, 42(2):109–142, 1980.
- [8] Alan Agresti. Tutorial on modeling ordered categorical response data. *Psychol Bull*, 105(2):290–301, March 1989.
- [9] R. M. May. The scientific wealth of nations. *Science*, 275(5301):793–796, 1997.
- [10] D. A. King. The scientific impact of nations. *Nature*, 430(6997):311–316, 2004.

- 194 [11] L. Bornmann and L. Leydesdorff. Macro-indicators of citation impacts of six prolific countries:  
195 Incites data and the statistical significance of trends. *PLoS One*, 8(2), 2013.
- 196 [12] Hadley Wickham. *ggplot2: elegant graphics for data analysis*. Springer New York, 2009.
- 197 [13] Wickham and Hadley. Reshaping data with the reshape package. *Journal of Statistical Soft-*  
198 *ware*, 21(12), 2007.
- 199 [14] Hadley Wickham. *stringr: Make it easier to work with strings.*, 2012. R package version 0.6.2.
- 200 [15] Baptiste Auguie. *gridExtra: functions in Grid graphics*, 2012. R package version 0.9.1.
- 201 [16] David B. Dahl. *xtable: Export tables to LaTeX or HTML*, 2013. R package version 1.7-1.
